# Supplementary material
Source: PubMed Central journal article supplement (PMC8214824)
Supplement: NIHMS1703393-supplement-Supplement_1.pdf [file NIHMS1703393-supplement-Supplement_1.pdf]

## Supplement Figures

### **Sodium Action Potentials in Placozoa: Insights into Behavioral Integration and Evolution of Nerveless Animals**

Daria Y. Romanova<sup>1¶</sup>, Ivan V. Smirnov<sup>1¶</sup>, Mikhail A. Nikitin<sup>2¶</sup>, Andrea B. Kohn<sup>3</sup>, Alisa I. Borman<sup>4</sup>, Alexey Y. Malyshev<sup>1</sup>, Pavel M. Balaban<sup>1\*</sup>, Leonid L. Moroz<sup>3,5\*</sup>

<sup>1</sup>Institute of Higher Nervous Activity and Neurophysiology, Moscow 117485, Russia;

<sup>2</sup>Belozersky Institute of Physico-Chemical Biology, Moscow State University, Moscow 119991, Russia;

<sup>3</sup>Whitney Laboratory for Marine Bioscience, University of Florida, St. Augustine, FL, 32080, USA;

<sup>4</sup>Department of Evolutionary Biology, Biological Faculty, Lomonosov Moscow State University, Moscow 119991, Russia;

<sup>5</sup>Departments of Neuroscience and McKnight Brain Institute, University of Florida, Gainesville, FL, 32610, USA

**Two supplementary figures:**

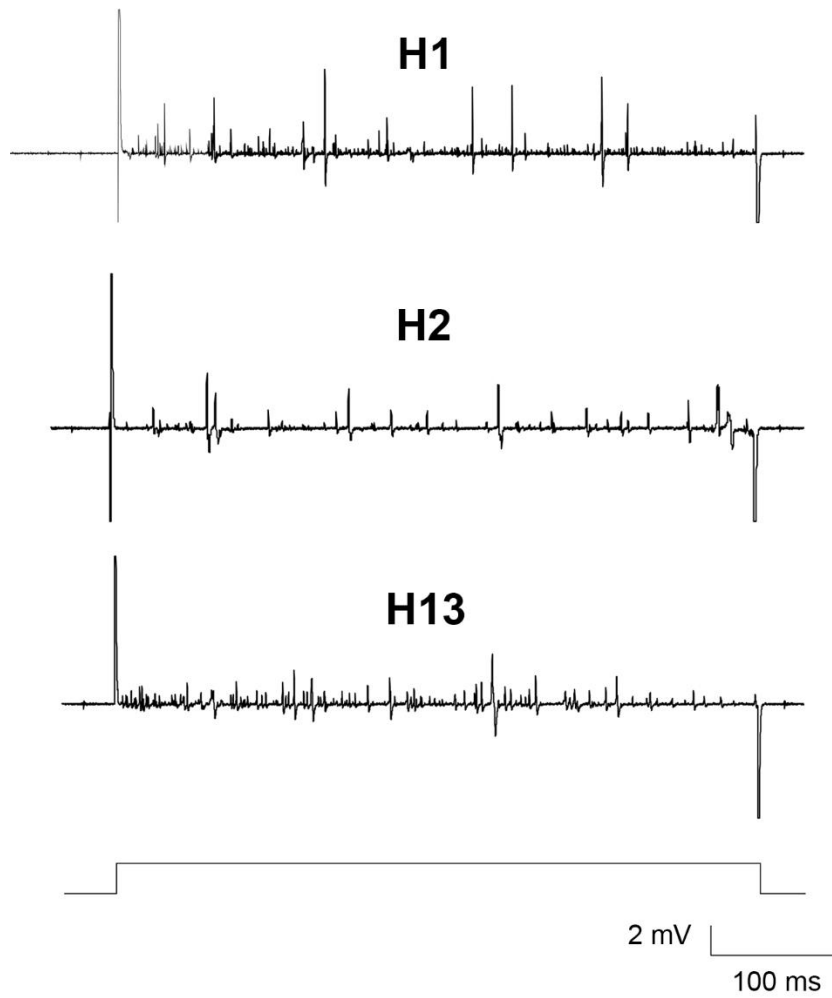

**Figure 1S.** Electrical activity (extracellular recording) in three different placozoan species: *Trichoplax adhaerens*, H1 haplotype; *Trichoplax* sp.; H2 haplotype; *Hoilungia hongkongensis*, H13 haplotype. Currents: H1 – 60 nA, H2 – 50 nA, H13 – 20 nA.
