# Supplementary material
Source: PubMed Central journal article supplement (PMC8214824)
Supplement: NIHMS1703393-supplement-Supplement_2.pdf [file NIHMS1703393-supplement-Supplement_2.pdf]

## Supplementary Table 1

### **Sodium Action Potentials in Placozoa: Insights into Behavioral Integration and Evolution of Nerveless Animals**

Daria Y. Romanova<sup>1¶</sup>, Ivan V. Smirnov<sup>1¶</sup>, Mikhail A. Nikitin<sup>2¶</sup>, Andrea B. Kohn<sup>3</sup>, Alisa I. Borman<sup>4</sup>, Alexey Y. Malyshev<sup>1</sup>, Pavel M. Balaban<sup>1\*</sup>, Leonid L. Moroz<sup>3,5\*</sup>

<sup>1</sup>Institute of Higher Nervous Activity and Neurophysiology, Moscow 117485, Russia;

<sup>2</sup>Belozersky Institute of Physico-Chemical Biology, Moscow State University, Moscow 119991, Russia;

<sup>3</sup>Whitney Laboratory for Marine Bioscience, University of Florida, St. Augustine, FL, 32080, USA;

<sup>4</sup>Department of Evolutionary Biology, Biological Faculty, Lomonosov Moscow State University, Moscow 119991, Russia;

<sup>5</sup>Departments of Neuroscience and McKnight Brain Institute, University of Florida, Gainesville, FL, 32610, USA

**Supplementary Table 1:** Species used for comparative bioinformatic analysis and download links of their protein models (if not available in GenBank).

| Species                                           | Phyla            | Download link (if not available in GenBank)                                                                                                                           |
|---------------------------------------------------|------------------|-----------------------------------------------------------------------------------------------------------------------------------------------------------------------|
| <i>Salpingoeca rosetta</i>                        | Choanoflagellata | <a href="https://www.ncbi.nlm.nih.gov/genome/?term=Salpingoeca+rosetta">https://www.ncbi.nlm.nih.gov/genome/?term=Salpingoeca+rosetta</a>                             |
| <i>Monosiga brevicollis</i>                       | Choanoflagellata | <a href="https://www.ncbi.nlm.nih.gov/genome/?term=Monosiga+brevicollis">https://www.ncbi.nlm.nih.gov/genome/?term=Monosiga+brevicollis</a>                           |
| <i>Mnemiopsis leydi</i>                           | Ctenophora       | <a href="https://research.nhgri.nih.gov/mnemiopsis/download/download.cgi?dl=proteome">https://research.nhgri.nih.gov/mnemiopsis/download/download.cgi?dl=proteome</a> |
| <i>Pleurobrachia bachei</i>                       | Ctenophora       | <a href="https://neurobase.rc.ufl.edu/Pleurobrachia/download">https://neurobase.rc.ufl.edu/Pleurobrachia/download</a>                                                 |
| <i>Amphimedon queenslandica</i>                   | Porifera         | <a href="https://www.ncbi.nlm.nih.gov/genome/?term=Amphimedon+queenslandica">https://www.ncbi.nlm.nih.gov/genome/?term=Amphimedon+queenslandica</a>                   |
| <i>Ephydatia mulleri</i>                          | Porifera         | <a href="https://spaces.facsci.ualberta.ca/ephybase/">https://spaces.facsci.ualberta.ca/ephybase/</a>                                                                 |
| <i>Sycon ciliatum</i>                             | Porifera         | <a href="https://datadryad.org/stash/dataset/doi:10.5061/dryad.tn0f3">https://datadryad.org/stash/dataset/doi:10.5061/dryad.tn0f3</a>                                 |
| <i>Trichoplax adhaerens H1</i><br>(annotation V2) | Placozoa         | <a href="https://genomeevolution.org/coge/SearchResults.pl?s=31909&amp;p=genome">https://genomeevolution.org/coge/SearchResults.pl?s=31909&amp;p=genome</a>           |
| <i>Trichoplax sp. H2</i>                          | Placozoa         | <a href="https://www.ncbi.nlm.nih.gov/genome/?term=Trichoplax+sp.+H2">https://www.ncbi.nlm.nih.gov/genome/?term=Trichoplax+sp.+H2</a>                                 |
| <i>Hoiungia hongkongensis H13</i>                 | Placozoa         | <a href="https://bitbucket.org/molpalmuc/hoilungia-genome/src/master/">https://bitbucket.org/molpalmuc/hoilungia-genome/src/master/</a>                               |
| <i>Hoilungia sp. H4</i>                           | Placozoa         | own data, see See Supplement 2 for all sequences                                                                                                                      |
| <i>Nematostella vectensis</i>                     | Cnidaria         | <a href="https://www.ncbi.nlm.nih.gov/genome/?term=Nematostella+vectensis">https://www.ncbi.nlm.nih.gov/genome/?term=Nematostella+vectensis</a>                       |
| <i>Stylophora pistillata</i>                      | Cnidaria         | <a href="https://www.ncbi.nlm.nih.gov/genome/?term=Stylophora+pistillata">https://www.ncbi.nlm.nih.gov/genome/?term=Stylophora+pistillata</a>                         |
| <i>Hydra vulgaris</i>                             | Cnidaria         | <a href="https://www.ncbi.nlm.nih.gov/genome/?term=Hydra+vulgaris">https://www.ncbi.nlm.nih.gov/genome/?term=Hydra+vulgaris</a>                                       |
| <i>Clytia hemisphaerica</i>                       | Cnidaria         | <a href="http://marimba.obs-vlfr.fr/downloads/">http://marimba.obs-vlfr.fr/downloads/</a>                                                                             |

|                                     |          |                                                                                                                                                                               |
|-------------------------------------|----------|-------------------------------------------------------------------------------------------------------------------------------------------------------------------------------|
| <i>Morbakka virulenta</i>           | Cnidaria | <a href="https://marinegenomics.oist.jp/morbakka_virulenta/viewer/info?project_id=70">https://marinegenomics.oist.jp/morbakka_virulenta/viewer/info?project_id=70</a>         |
| <i>Aurelia aurita</i><br>(Atlantic) | Cnidaria | <a href="https://marinegenomics.oist.jp/aurelia_aurita/viewer/info?project_id=69">https://marinegenomics.oist.jp/aurelia_aurita/viewer/info?project_id=69</a>                 |
| <i>Aurelia aurita</i><br>(Pacific)  | Cnidaria | <a href="https://marinegenomics.oist.jp/aurelia_aurita_pacific/viewer/info?project_id=75">https://marinegenomics.oist.jp/aurelia_aurita_pacific/viewer/info?project_id=75</a> |
| <i>Rhopilema esculentum</i>         | Cnidaria | <a href="http://gigadb.org/dataset/view/id/100720/File_sort/format_id">http://gigadb.org/dataset/view/id/100720/File_sort/format_id</a>                                       |
| <i>Chrysaora quinquecirrha</i>      | Cnidaria | <a href="https://datadryad.org/stash/dataset/doi:10.5061/dryad.br15dv6c">https://datadryad.org/stash/dataset/doi:10.5061/dryad.br15dv6c</a>                                   |
