# Supplementary material
Source: PubMed Central journal article supplement (PMC8214824)
Supplement: NIHMS1703393-supplement-Supplement_3.pdf [file NIHMS1703393-supplement-Supplement_3.pdf]

## Supplement 3

### Sodium Action Potentials in Placozoa: Insights into Behavioral Integration and Evolution of Nerveless Animals

Daria Y. Romanova<sup>1¶</sup>, Ivan V. Smirnov<sup>1¶</sup>, Mikhail A. Nikitin<sup>2¶</sup>, Andrea B. Kohn<sup>3</sup>, Alisa I. Borman<sup>4</sup>, Alexey Y. Malyshev<sup>1</sup>, Pavel M. Balaban<sup>1\*</sup>, Leonid L. Moroz<sup>3,5\*</sup>

<sup>1</sup>Institute of Higher Nervous Activity and Neurophysiology, Moscow 117485, Russia; <sup>2</sup>Belozersky Institute of Physico-Chemical Biology, Moscow State University, Moscow 119991, Russia; <sup>3</sup>Whitney Laboratory for Marine Bioscience, University of Florida, St. Augustine, FL, 32080, USA; <sup>4</sup>Department of Evolutionary Biology, Biological Faculty, Lomonosov Moscow State University, Moscow 119991, Russia; <sup>5</sup>Departments of Neuroscience and McKnight Brain Institute, University of Florida, Gainesville, FL, 32610, USA

**Supplementary Data 2:** Alignments of predicted sequences encoded Na<sub>v</sub> channels in Placozoa: *Trichoplax adhaerens* (H1 haplotype), *Trichoplax* sp. (H2 haplotype), *Hoilungia* sp. (H4 haplotypes), *Hoilungia hongkongensis* (H13 haplotype).

**Yellow** – polar, acidic amino acids

**Light blue** – polar, basic amino acids

**Grey** – non-polar, hydrophobic amino acids

**Green** – polar, uncharged amino acids

**Purple** - cysteine

#### Abbreviations:

DI - Domain I

DII - Domain II

DIII - Domain III

DIV - Domain IV

Inactivation gate

H1\_Nav1 1 -----MKGGIRIGHFFRRRQRRTSPLER-----PNDPDDQQTQNNERDLTWTHAQSQSNGQHIANLEPS--PDVVGEEEDIHQGKK  
 H2\_Nav\_1 0 -----  
 H4\_Nav\_1 1 -----MKSGIRMSLIFGRGKRKTSPIEKTDVVNPDDKQVQKKNPPGGNLTWTLAQNPQKDHPEINVVN--TSVDKNGEVKNQTK  
 H13\_Nav1 0 -----  
 H1\_Nav\_2 1 -----MDQGYGHVISVNT---PDYEDWKDFNQNRK  
 H2\_Nav\_2 1 -----MDQGYGHVISVNT---PDYEDWKDFNQNRK  
 H4\_Nav\_2 1 -----MEANNKYVVPVS---ANMPYEDFDQSRK  
 H13\_Nav\_2 1 -----MEANNKYVVPVS---ANMPYEDFDQSRK  
 H1\_Nav\_3 1 -----MANTNPELVNDGFSQKDVQKQNFRESLTPVKNLDYAMSNSDENRTDVDTGKKD--AVKVEDDIEESKR  
 H2\_Nav\_3 0 -----  
 H4\_Nav\_3 1 -----MSDADIDLVKDRYNRISVKRRRVHQPPIEDNVNTQSVPLNDRNDVVEENDRACQONSEODDIEESKR  
 H13\_Nav\_3 1 -----MSDADIDLVKDRYNRISVKRRVRQPSPIEDNVNTQSVPLNDRNDVASENDRACQONSEODDIEESKR  
 H1\_Nav\_4 1 MRQFAFEICNALLALLHIATLDGWKAIMRNAVDAARGRNLMPEALFNTPARIFILFIVGVFITLNLIAAGVIID--HFYNSRKEEYEMRKG  
 H2\_Nav\_4 0 -----  
 H13\_Nav\_4 0 -----  
 H4\_Nav\_4 1 -----MKTKTLNITVGVKADGRTEIELHDLQNVEEE--GSSCEDITDHSMS  
 H1\_Nav\_5 1 -----MAFSNRNNVRRKSTYHIDINADGGAEVKLLKDVQAVTDD--DSDIEVVSTDENSR  
 H2\_Nav\_5 1 -----MAFSNRNNVRRKSTYHIDINADGGAEVKLLKDVQAVTDD--DSDIEVVSTDENSR  
 H4\_Nav\_6 0 -----  
 H13\_Nav\_6 0 -----  
 H13\_Nav\_7 1 -----MVSETGRRRRSVYTVGVTVDGDARVRFEDILPVKDD--DSDILAEESDQLGN  
 H4\_Nav\_7 1 -----MVSETDRRRRSVYNVGVTVDGDARVRFKDIILPVKDD--DSDILAEESDQLGN  
 H4\_Nav7 1 -----MVSETGRRRRSVYTVGVTVDGDARVRFEDILPVKDD--DSDILAEESDQLGN  
 H13\_Nav\_7 1 -----MVSETGRRRRSVYTVGVTVDGDARVRFEDILPVKDD--DSDILAEESDQLGN  
  
 H1\_Nav1 74 KKKFSNPLYENLLAKGVVGKYVED-----VDPDQQNGFS-----  
 H2\_Nav\_1 0 -----  
 H4\_Nav\_1 80 KKKKLNPVYENLLAKGVVGKYVED-----VDPNQNTFC-----  
 H13\_Nav1 0 -----  
 H1\_Nav\_2 27 -----CINEQIKKNHLTGKLVKD-----FDQQQTDVSAIFI-----  
 H2\_Nav\_2 27 -----CINEQIKKNHLTGKLVKD-----FDQQQTDVSAIFI-----  
 H4\_Nav\_2 26 -----YINEKIKEQKLPGKLIIRD-----FDEDQIDTVCLLTRRMNSYVY-----RYHTSKALYFFPPNPNP  
 H13\_Nav\_2 26 -----FINEKIKEQKLPGKLIIRD-----FDEDQLDVTCLLTRRMNSYVY-----RYHTSKALYFFPPNPNP  
 H1\_Nav\_3 66 -----LIIQIKIEGLIDVYVQD-----IDPEQENYVGL-----NLIVEVAIIKTTLK  
 H2\_Nav\_3 0 -----  
 H4\_Nav\_3 67 -----LIIQIEREGLVGIYIKE-----SDPEQHNTVCVLRRRRMGEYQIH-----RFNSSPSLFLVLPQTNP  
 H13\_Nav\_3 67 -----LIIQIEREGLVGIYIKE-----SDPEQHNTVCVLRRRRMGEYQIH-----RFNSSPSLFLVLPQTNP  
 H1\_Nav\_4 89 KNIESLFTESQLQWYKMMKKLMRTKLVKSIPPAKFGWQKLRVFFEDRRYEAFNIAVVFVNMVMTATHYQSAQITTTLSIALFKGVKK  
 H2\_Nav\_4 0 -----  
 H13\_Nav\_4 0 -----  
 H4\_Nav\_4 46 -----NRYLKLEQSQAIGKYVMD-----FDP-----  
 H1\_Nav\_5 52 -----RYRILEESQLIGKYVVD-----FDETQDNV-----  
 H2\_Nav\_5 52 -----RYRILEESQLIGKYVVD-----FDETQDNVFCIIVRRFGSYEVY-----  
 H4\_Nav\_6 0 -----  
 H13\_Nav\_6 0 -----  
 H13\_Nav\_7 50 -----RYRTLEDSNVIGKYVVD-----FDASQKH-----  
 H4\_Nav\_7 50 -----RYRTLEDSNVIGKYVVD-----FDASQKHTFCIITKRFGQYDIH-----RFNTARSIFLFPDNW  
 H4\_Nav7 50 -----RYRTLEDSNVIGKYVVD-----FDASQKHTFCVITKRFGQYDIH-----RFNTARSIFLFPDNW  
 H13\_Nav\_7 50 -----RYRTLEDSNVIGKYVVD-----FDASQKHTFCIITKRFGQYDIH-----  
  
 H1\_Nav1 107 -NGQNLSLTLATFFDFVLLIILS-----NCVLLAFRP-----EEISSYNTIEIGYNVVYTIEMTLKIIARGFIIHRFAYLRDPWN  
 H2\_Nav\_1 0 -----  
 H4\_Nav\_1 113 -----IITFRS-----EEIPSYNAVEIGYNIYVTVEMCFKITARGFILHRYAYLRDPWN  
 H13\_Nav1 1 -----MNTFFDFFILLTILS-----NCILLAFRS-----EEIPSYNAVEIGYNIYVTVEMCFKITARGFILHRYAYLRDPWN  
 H1\_Nav\_2 58 -----NCVLMAFP-----GIDPSIEITFNTIYTVEMLLKIMARGFIFHTYAYLRDPWN  
 H2\_Nav\_2 58 -----NCVLMAFP-----GIDPSIEITFNTIYTVEMLLKIMARGFIFHTYAYLRDPWN  
 H4\_Nav\_2 83 MRLIAMRITSNQFFDIFIFITIFT-----NCVLMAFP-----GFDSSLEIVFNAIYTEMILKILARGFVLHNYAYLRDPWN  
 H13\_Nav\_2 83 MRLIAMRITSNQFFDIFIFITIFT-----NCVLMAFP-----GFDSSLEIVFNAIYTEMILKILARGFVLHNYAYLRDPWN  
 H1\_Nav\_3 110 LLFAKESKKYLRYFEMTLILVILA-----NCIFVAFPTQKSDINALSDMEYVSIYGFNFVYTIEMLLKIVARGFISHQFAYLRDPWN  
 H2\_Nav\_3 1 -----MTLILVILA-----NCIFVAFPTQKSDINALSDMEYVSIYGFNFVYTIEMLLKIVARGFISHQFAYLRDPWN  
 H4\_Nav\_3 124 LRKAASIVTNQYFEMLLILVILA-----NCIFVAFSPKSDTGALDMEYISIAFNAFYTEMILKIIARGFILHRYAYLRDPWN  
 H13\_Nav\_3 124 LRKAASIVTNQYFLPHSSSKTT-----NCIFVAFSPKSDTGALDMEYISIAFNAFYTEMILKIIARGFILHRYAYLRDPWN  
 H1\_Nav\_4 179 QGTIDNTLNFQSYTKATIILIQLSTASGWTDFLDALSIQPPDCVPSNTEETIIPGTGCGSRVLATIIYIITYMIMAWFILINLFIIVILNN  
 H2\_Nav\_4 0 -----  
 H13\_Nav\_4 1 -----MTLKILARGLISKKFTFLRDPWN  
 H4\_Nav\_4 67 -----MLR-----KCTSDIFYF-----YLSGRITFNVIYTIEMLLKILARGLFSKKFTFLRDPWN  
 H1\_Nav\_5 77 -----STTNRIGRFLTRFIPIEMLLKITARGLFRHKFCFLRDLWN  
 H2\_Nav\_5 91 -----RFNTAKSLFVLEPDN  
 H4\_Nav\_6 1 -----MAIFLTLA-----NCITIALPY-----PTPFAVLVIFNVIYTLKEMGIKIVARGLIGHRRFTFLRSFWD

H13\_Nav\_6 1 -----MAIFLTLA-----NCITIALPY-----PTPFAVLVIFNVIYTL**EMGIK**IIVARGLIGHRFTFLRSLWN  
H13\_Nav\_7 74 -----YFELAILLTIIT-----NCVLIALPY-----AIPLYATIIFNAIYTL**EMVLK**IIARGFILKKFTFLRDLWN  
H4\_Nav\_7 106 IRYLAIKI-----YFELAILLTIIT-----NCVLIALPY-----AIPLYATIIFNAIYTL**EMVLK**IIARGFIRKKFTFLRDLWN  
H4\_Nav7 106 IRYLAIKIVTSH-----NCVLIALPY-----AIPLYATIIFNAIYTL**EMVLK**IIARGFIWKKFTFLRDLWN  
H13\_Nav\_7 89 -----RFNARSILLFKPDN

H1\_Nav1 183 **WDLFL**-----VVVLGFVAaipqLSYI---PGIGVVRVFRALRM-----ITVIDGLKTMVNAMLK**S**  
H2\_Nav\_1 0 -----  
H4\_Nav\_1 163 **WLDFT**-----VVVLGYIAAIPALSIV---PGIGVVRVFRALRM-----ITVIDGLKTMVNAMFK**S**  
H13\_Nav1 68 **WLDFT**-----VVVLGYIAAIPALSIV---PGIGVVRVFRALRM-----ITVIDGLKTMVNAMFK**S**  
H1\_Nav\_2 108 **WLDFI**-----VVIVGYLTMIPALSVL---PGASVIRVLRALRM-----ITALEGLKAIVNALFK**S**  
H2\_Nav\_2 108 **WLDFI**-----VVIVGYLTMIPALSVL---PGASVIRVLRALRM-----ITALEGLKAIVNALFK**S**  
H4\_Nav\_2 156 **WLDFT**-----VVIVGYLTMIPALSVL---PGASIIRVLRALRM-----ITALEGLKAIVNALFK**S**  
H13\_Nav\_2 156 **WLDFI**-----VVIVGYLTMIPALSVL---PGASIIRVLRALRM-----ITALEGLKAIVNALFK**S**  
H1\_Nav\_3 191 **WLDFI**-----IVIMGYLTLIPALSVL---PSISSVRVLRALRM-----ITAIKGLKTIVNAI**HS**  
H2\_Nav\_3 67 **WLDFI**-----IVIMGYLTLIPALSVL---PSISSVRVLRALRM-----ITAIKGLKTIVNAI**HS**  
H4\_Nav\_3 205 **WLDFI**-----IVIMGYLTLIPALSVL---FSISSLRVLRALRM-----ITAIKGLKTIVNAI**HS**  
H13\_Nav\_3 205 **WLDFI**-----IVIMGYLTLIPALSVL---FSISSLRVLRALRM-----ITAIKGLKTIVNAI**HS**  
H1\_Nav\_4 269 **YQDCVE**ADSANIT**EED**IQGF**F**EWAKY**D**RKATQ**F**IHYNMLSP**LL**ND**LL**PPFGSP**IP**NTY**VC**ISLN**LP**Y**DD**TK**I**HC**LD**LIRALLNK**VM**K**D**  
H2\_Nav\_4 0 -----  
H13\_Nav\_4 24 **WLDLI**-----IVIVGYATLIPGL**EHV**---PAISAIRVFRALRM-----FTIIEGLKRILNAI**IQS**  
H4\_Nav\_4 118 **CLDLV**-----IVLVGYITLIP**LEAI**---PGMSALRVFRALRM-----FTIIEGLKKILNAI**IQS**  
H1\_Nav\_5 118 **WLDLV**-----IVIVGYTVFV**PGL**NVI---PGISVIRVLRALRM-----VTMVKGLKSIVNAV**FQS**  
H2\_Nav\_5 107 **WIRYL**-----AGS-----  
H4\_Nav\_6 59 **WFDLL**-----IVIIGYMIFIP**PAIS**II---PGISIVRVLRALRM-----FTI**IK**GLKRIVNAI**LKS**  
H13\_Nav\_6 59 **WFDLV**-----IVIIGYIIFIP**PAIS**II---PGISIVGVLRALRM-----FTI**IK**GLKRIVNAI**LKS**  
H13\_Nav\_7 136 **WLDLV**-----IVIIGYTVFIP**V**LNVI---PGVSVIRVLRALRM-----FTI**VK**GLKGILNAI**FQS**  
H4\_Nav\_7 175 **WLDLV**-----IVIIGYTVFIP**V**LNVI---PGVSVIRVLRALRM-----FTI**VK**GLKGILNAI**FQS**  
H4\_Nav7 167 **WLDLV**-----IVIIGYTVFIP**V**LNVI---PGVSVIRVLRALRM-----FTI**VK**GLKGILNAI**FQS**  
H13\_Nav\_7 105 **WIRYL**-----

H1\_Nav1 234 -----LRMLT**D**VF-----YLTIF**FL**CF**I**FALLGLQMF**MG**VL**SQK**CCL-PY-----  
H2\_Nav\_1 0 -----  
H4\_Nav\_1 214 -----LRMLT**D**VF-----YLTIF**FL**CF**I**FALLGLQMF**MG**VL**SQK**CCL-PY-----  
H13\_Nav1 119 -----LRMLT**D**VF-----YLTIF**FL**CF**I**FALLGLQMF**MG**VL**SQK**CCL-PY-----  
H1\_Nav\_2 159 -----FRMLAD**V**F-----CLALFIL**I**IIFALIGV**Q**LFMGIL**TQK**CC**R**-PF-----  
H2\_Nav\_2 159 -----FRMLAD**V**F-----CLALFIL**I**IIFALIGV**Q**LFMGIL**TQK**CC**R**-PF-----  
H4\_Nav\_2 207 -----FKMLAD**V**F-----CLALFIL**I**IIFALIGV**Q**LFMGVL**TQK**CC**R**-PF-----  
H13\_Nav\_2 207 -----FKMLAD**V**F-----CLALFIL**I**IIFALIGV**Q**LFMGVL**TQK**CC**R**-PF-----  
H1\_Nav\_3 240 -----MNMLAN**V**L-----SLTLL**FL**TGFALL**GV**QLFM**GV**LS**RK**CI**KQ**R**F**-----  
H2\_Nav\_3 116 -----MNMLAN**V**L-----SLTLL**FL**TGFALL**GV**QLFM**GV**LS**RK**CI**KQ**R**F**-----  
H4\_Nav\_3 254 -----MDMLAN**V**L-----SLTLL**FL**IAFALL**GV**QLFM**GV**LS**RR**CV**KH**PF-----  
H13\_Nav\_3 254 -----MDMLAN**V**L-----SLTLL**FL**IAFALL**GV**QLFM**GV**LS**RR**CV**KH**PF-----  
H1\_Nav\_4 359 **VIG**E**I**S**Q**E**F**E**E**E**Y**D**L**L**M**K**K**I**A**E**V**C**K**T**K**F**P**K**W**K**P**Q**N**S**Q**V**K**K**T**S**A**V**F**Y**N**E**A**K**S**V**I**L**L**R**A**A**F**Q**H**W**R**Q**E**T**A**K**-**K**F**K**Q**R**K**V**S**V**I**N**V**G**I**K**A**S**G**K**A**K  
H2\_Nav\_4 1 -----MLV**T**V**L**-----SLT**L**Y**F**L**C**G**V**S**L**L**G**V**Q**L**F**M**G**I**L**T**R**K**C**C**K**-**T**Y-----  
H13\_Nav\_4 75 -----INML**L**T**V**L-----SLT**L**F**Y**L**C**G**T**S**L**S**V**Q**L**F**M**G**V**L**T**R**K**C**C**L**-**TY-----  
H4\_Nav\_4 169 -----MNMLAN**V**L-----SLT**L**F**L**C**G**AS**L**SA**Q**L**F**M**G**V**L**T**R**K**C**C**L**-TY-----  
H1\_Nav\_5 169 -----I**H**ML**I**T**V**L-----SLT**L**F**F**L**C**G**V**ALL**GV**QL**F**M**G**V**L**T**R**K**C**C**L**-----  
H2\_Nav\_5 114 -----M**E**LAG**F**G**Y**-----C**S**R**I**Y**S**I**C**T**R**L**K**C**N**P**R**Y**Q**R**Y**S**S**S**K**S-----  
H4\_Nav\_6 110 -----FN**K**L**I**T**V**L-----SLT**L**F**F**L**C**G**V**T**L**L**G**V**Q**L**F**M**G**V**L**T**R**K**C**C**I**-TY-----  
H13\_Nav\_6 110 -----FN**K**L**I**T**V**L-----SLT**L**F**F**L**C**G**V**T**L**L**G**V**Q**L**F**M**G**V**L**T**R**K**C**C**I**-TY-----  
H13\_Nav\_7 187 -----LS**M**L**M**T**V**L-----SLT**L**F**F**L**C**G**V**ALL**GV**QL**F**M**G**I**L**T**R**K**C**C**L**-TY-----  
H4\_Nav\_7 226 -----LS**M**L**M**T**V**L-----SLT**L**F**F**L**C**G**V**ALL**GV**QL**F**M**G**I**L**T**R**K**C**C**L**-TY-----  
H4\_Nav7 218 -----LS**M**L**M**T**V**L-----SLT**L**F**F**L**C**G**V**ALL**GV**QL**F**M**G**I**L**T**R**K**C**C**L**-TY-----  
H13\_Nav\_7 109 -----G**D**K**D**C**N**-----

H1\_Nav1 272 -----D**Y**N**R**S**A**I**D**P**S**P**S**T**L**Q**S**Y**V**L**N**E-----TLAN**W**-----L**R**D**G**-**D**D**Y**I**C**G**N**S**S**T**A**R**S**C**S**K**S**Y**S**P**N**H**V**C**Y**E**G**A  
H2\_Nav\_1 0 -----  
H4\_Nav\_1 252 -----D**Y**N**R**S**T**T**D**P**D**Y**P**A**T**L**Q**K**Y**V**L**N**E**-----TLAG**W**-----L**K**E**G**-**D**D**Y**I**C**G**N**S**S**T**A**R**N**C**S**K**S**Y**S**S**H**I**C**Y**E**G**A**  
H13\_Nav1 157 -----D**Y**N**R**S**T**T**D**P**D**Y**P**A**T**L**Q**K**Y**V**L**N**E**-----TLAG**W**-----L**K**E**G**-**D**D**Y**I**C**G**N**S**S**T**A**R**N**C**S**K**S**Y**S**S**H**I**C**Y**E**G**A**  
H1\_Nav\_2 197 -----N**S**T**G**D**I**V**G**P**F**T**T**T**K**F**K**N**Y**V**N**V**S**-----S**-**N**W**-----Y**F**E**N**-**G**D**P**V**I**C**G**N**E**S**S**A**R**H**C**---P**A**D**Y**L**C**Y**Q**Y**A**  
H2\_Nav\_2 197 -----N**S**T**G**D**I**V**E**P**F**T**M**T**K**F**K**N**Y**V**N**V**S**-----S**-**N**W**-----Y**F**E**N**-**G**D**P**V**I**C**G**N**E**S**S**A**R**H**C**---P**V**D**Y**L**C**Y**Q**Y**A**  
H4\_Nav\_2 245 -----N**S**T**G**I**P**G**P**F**T**M**A**K**F**K**S**Y**A**N**D**S-----S**-**N**W**-----Y**Y**D**N**-**S**E**P**I**L**C**G**N**G**S**S**A**R**H**C**---P**S**D**Y**L**C**Y**Q**Y**A**  
H13\_Nav\_2 245 -----N**S**T**G**I**P**G**P**F**T**M**A**K**F**K**S**Y**A**N**D**S-----S**-**N**W**-----Y**Y**D**N**-**S**E**P**I**L**C**G**N**G**S**S**A**R**H**C**---P**S**D**Y**L**C**Y**Q**Y**A**  
H1\_Nav\_3 279 -----D**F**N**A**T**Y**---N**S**S**K**A**F**N**D**Y**I**T**N**S-----K**-**N**W**-----V**T**S**G**T**E**S**S**I**C**G**N**D**S**F**T**R**Q**D**Y**I**Q**K**G**S**V**C**Y**Q**D**A  
H2\_Nav\_3 155 -----D**F**N**A**T**Y**---N**S**S**K**A**F**N**D**Y**I**T**N**S-----K**-**N**W**-----V**T**S**G**T**E**S**S**I**C**G**N**D**S**F**T**R**Q**D**H**I**Q**K**G**S**V**C**Y**Q**D**A  
H4\_Nav\_3 293 -----N**Y**T**E**N**V**T**Y**Q**D**Y**L**A**A**K**S**Y**I**T**N**S-----A**-**N**W**-----V**Y**E**G**D**G**E**S**I**C**G**N**S**L**A**R**N**C**S**L**I**S**P**G**A**F**C**Y**Q**D**A  
H13\_Nav\_3 293 -----N**Y**T**E**N**V**T**Y**Q**D**Y**L**A**A**K**S**Y**I**T**N**S-----A**-**N**W**-----V**Y**E**G**D**G**E**S**I**C**G**N**S**L**A**R**N**C**S**L**I**S**P**G**A**F**C**Y**Q**D**A  
H1\_Nav\_4 448 **I**E**R**Q**D**V**E**E**V**D**E**S**E**S**E**V**E**A**T**T**S**T**D**E**L**A**V**K**Y**R**K**L**E**E**S**H**V**V**G**K**Y**V**E**D**Y**D**A**M**Q**N**G**F**A**T**R**R**E**V**L**E**R**V**E**N**N**V**I**V**E**L**L**R**L**Y**K**A**C**---P**S**G**Y**S**C**Y**E**G**I**  
H2\_Nav\_4 36 -----N**W**N**Q**T**D**Y**D**V**D**G**-**L**S**F**D**L**F**I**K**N**K**-----T**-**N**W**-----L**Y**S**G**-**G**S**T**V**L**C**S**N**S**S**I**N**T**A**C**---P**S**G**Y**S**C**Y**E**G**I**  
H13\_Nav\_4 113 -----N**V**N**Q**T**Y**L**N**Q**T**Y**T**P**S**F**N**T**F**I**Q**N**T**-----S**-**N**W**-----L**Y**V**G**-**G**S**S**V**V**C**S**N**A**S**T**N**L**Q**C**---P**S**G**Y**S**C**Y**E**G**L**

H4\_Nav\_4 207 -----DVNQTYLNNTYMPSTDFVKN-----S--NW-----LQIN-EEYVLCASNASKSLQC---PNGYSCYEGL  
H1\_Nav\_5 205 -----TYNASNYNGSY-ASFNQFVNTTDDSEAFFKYWIG--NW-----LYID-GETKVCNGNTSDNYLC---PSGYSCYEGL  
H2\_Nav\_5 148 -----DQNGDDGESKLPILIKVSGNLA-----VSGNW-----LYID-GETKVCNGNTSDNYLC---PSGYSCYEGL  
H4\_Nav\_6 148 -----NTNHTDYNGSF-ISFNQFVLS-----S--NW-----YHVD-GKPVVCGNFSDNYMC---PSGYSCYEGL  
H13\_Nav\_6 148 -----NTNHTDYNGSF-ISFNQFVLS-----S--NW-----YHVD-GKPVVCGNFSDNYMC---PSGYSCYEGL  
H13\_Nav\_7 225 -----DFNQTNYNDSYLTFFNQFVNS-----S--NW-----YEVD-GSYPVCGNLTDNRYC---PTGYSCYEGL  
H4\_Nav\_7 264 -----DFNQTNYNDSYLTFFNQFVNS-----S--NW-----YEVD-GSYPVCGNLTDNRYC---PTGYSCYEGL  
H4\_Nav7 256 -----DFNQTNYNDSYLTFFNQFVNS-----S--NW-----YKSD-GSYPVCGNLTDNRYC---PAGYSCYEGL  
H13\_Nav\_7 115 -----MIALYISANSRC---PAGYSCYEGL

**DI**

H1\_Nav\_1 332 LPNPND-GYTSFDNFPISELLNSFQLVTDFWEDPYNKISDAVDIGYALFFVFVIIIGSFYLLNLVIAVSMAYNQEDRLMHDL-----  
H2\_Nav\_1 0  
H4\_Nav\_1 312 LPNPNN-GYTSFDNFPLSLLNSFQLVTDFWEDPYNKISDAVDIGYALFFVFVIIIGSFYLLNLVIAVSMAYNQEYRLMHDL-----  
H13\_Nav1 217 LPNPNN-GYTSFDNFPLSLLNSFQLVTDFWEDPYNKISDAVDIGYALFFVFVIIIGSFYLLNLVIAVSMAYNQEYRLMHDL-----  
H1\_Nav\_2 252 YPNPND-GFTSFDNFVSLLSVFLITLDNWEDIYNKVNDAIDSWCIIFYIPVVLGAFVYMNLVIAIVAMAYNKEDKILQDQ-----  
H2\_Nav\_2 252 YPNPND-GFTSFDNFVSLLSVFLITLDNWEDIYNKVNDAIDSWCIIFYIPVVLGAFVYMNLVIAIVAMAYNKEDKILQDQ-----  
H4\_Nav\_2 300 YPNPND-GDRNFDNFPISELLVVFQVLTLDNWEDVYNKIHDVAVDSWCIIFYIPVVLGAFVYMNLVIAIVAMAYNKEDKLLQDQ-----  
H13\_Nav\_2 300 YPNPND-GYTSFDNFPISELLVVFQVLTLDNWEDVYNKIHDVAVDSWCIIFYIPVVLGAFVYMNLVIAIVAMAYNKEDKLLQDQ-----  
H1\_Nav\_3 335 FPNPGN--LTNYDTFPTSLLVCFQITSQDAWDEDYRS-----  
H2\_Nav\_3 211 FPNPGN--LTNYDTFPTSLLVCFQITSQDAWDEDYRSIISALGPYYIPFFIFILFFGTYYVNLVLAIVIALAYNKEVRLMEDQASIIISM  
H4\_Nav\_3 352 YVMVNHNTLNFYDTFSSLLVCFQVMSQDAWDEDYRAIISALGPYYIPFFFMVILFFGTFFVNLVLAIVIALAYNKEVRLMEDQ-----  
H13\_Nav\_3 352 YVMVNHNTLNFYDTFSSLLVCFQVMSQDAWDEDYRAIISALGPYYIPFFFMVILFFGTFFVNLVLAIVIALAYNKEVRLMEDQ-----  
H1\_Nav\_4 535 FPNPED-GLLNFDNLFASLYVNLQIITDQWDSYQSVLKASNTWYFFYFLAIFLGSDYLLNLILAVSMAYSKQEQLRSEQ-----  
H2\_Nav\_4 90 FPNPED-GLLNFDNLFASLYVNLQIITDQWDSYQSVLKASNTWYFFYFLAIFLGSDYLLNLILAVSMAYSKQEQLRSEQ-----  
H13\_Nav\_4 168 FPNPEN-GLLSFDNLFVLSLYVNLQIITDQWDSYQSVLKASNTWYFFYFLAIFLGSDYLLNLILAVSMAYSKQEQLLEEQ-----  
H4\_Nav\_4 262 FPNPDY-GLFSFDNFIASLYVNLQIITDQWDSYQSVLKASNTWYFFYFLAIFLGSDYLLNLILAVSMAYSKQEQLLEEQ-----  
H1\_Nav\_5 270 FPNPGR-GLLSFDNFPLSLYVNLQIVTDQWDTDYQTVLRATSIWYFPYFLAIFLGSDYLLNLILAVSMAYSKQKLVKEQ-----  
H2\_Nav\_5 205 FPNPGR-GLLSFDNFPLSLYVNLQIVTDQWDTDYQTVLRATSIWYFPYFLAIFLGSDYLLNLILAVSMAYSKQKLVKEQ-----  
H4\_Nav\_6 202 FPNPDD-NLLSFDNFGSGLFVNLIITDQWGDYQTVLRATNTWYFLYFLSIFFGTDYLMNLILAVISMAYSKQQLFEEQ-----  
H13\_Nav\_6 202 FPNPDD-NLLSFDNFGSGLFVNLIITDQWGDYQTVLRATNTWYFLYFLSIFFGTDYLMNLILAVISMAYSKQQLFEEQ-----  
H13\_Nav\_7 280 FPNPKD-GLLSFDNFPLSVFVNLIQIVTDNWDEDYQTVLKAANSMSFIYFAAIVFLGSDYLLNLILAVSMAYSKQKLEEM-----  
H4\_Nav\_7 319 FPNPKD-GLLSFDNFPLSVFVNLIQIVTDNWDEDYQTVLKAANSMSFIYFAAIVFLGSDYLLNLILAVSMAYSKQKLEEM-----  
H4\_Nav7 311 FPNPKD-GLLSFDNFPLSVFVNLIQIVTDNWDEDYQTVLKAASPIFIYFAAIVFGSYLLNLILAVSMAYSKQKLEET-----  
H13\_Nav\_7 138 FPNPKD-GLLSFDNFPLSVFVNLIQIVTDNWDEDYQTVLKAASPIFIYFAAIVFGSYLLNLILAVSMAYSKQKLEEDT-----

H1\_Nav1 413 -----LLNHSMMIATKKSSVFPYSEKAPT LWT LQNPSQSNI EEGTVKKDAISINTTNTENDAI-----  
H2\_Nav\_1 0  
H4\_Nav\_1 393 -----LMNPNKMEATSKSSVFPYSEKAPKLWTPQSLNNDNVEAGSIKCEPGENVNGGHP ELVK  
H13\_Nav1 298 -----LMNPNKMEATSKSSVFPYSEKAPKLWTPQSPNNQDNVEAGSIKCEPGENVNGGHP ELVK  
H1\_Nav\_2 333 -----KCDIRHMRESYRNSTVFFENEIPKLWIPKIGSNP-----  
H2\_Nav\_2 333 -----KCDIRHMRESYRNSTVFFENEIPKLWIPKIGSNP-----  
H4\_Nav\_2 381 -----KCDIRHMREA CKATVLF FFELELPSLWVPTASNQP-----  
H13\_Nav\_2 381 -----KCDIRHMREA CKATVLF FFELELPSLWVPTASNQP-----  
H1\_Nav\_3 369 -----NASKFNRLRASRGQSSF TFYPDTPVKRW HARTVHVNVE LLPRGFS AARRRIDLNL R-----  
H2\_Nav\_3 299 TQKLDLIYYSENYYLYTMKILKDHKPMKYNASKFNRLRASRGQSSF TFYPDTPVKRW HARTVHVNVE LLPRGFS AARRRIDLNL R-----  
H4\_Nav\_3 434 -----SASKFNRLKASKGQTFYFPDTPVKRWIPKSTKLNLFKRLRDRLSRTRTNINLRLRHIP  
H13\_Nav\_3 434 -----SASKFNRLKASKGQTFYFPDTPVKRWIPKSVKLNLFKRLRDRLSRTRTNINLRLRHIP  
H1\_Nav\_4 616 -----QNNFEK MVRTSRDQTIPYFLSPPHLWYPP-----  
H2\_Nav\_4 171 -----QNNFEK MVRTSRDQTIPYFLSPPHLWYPP-----  
H13\_Nav\_4 249 -----QNNVEK MIQTSRSDTSPYFLDAPPPLWVPP-----  
H4\_Nav\_4 343 -----QNNVEK MIQTSRSETSMRYFLDTPPPLWVPP-----  
H1\_Nav\_5 351 -----QTNIEKFIQMRNETLIPYLLVPPQLWQPA-----  
H2\_Nav\_5 286 -----QTNIEKFIQMRNETLIPYLLVPPQLWQPA-----  
H4\_Nav\_6 283 -----LHNPEK MIQTSKHETIIPYFCQPP ELWLPP-----  
H13\_Nav\_6 283 -----LHNPEK MIQTSKHETIIPYFCQPP ELWLPP-----  
H13\_Nav\_7 361 -----QNNFEK MIQTSRHHSNIPYVLD FPPQLWLPP-----  
H4\_Nav\_7 400 -----QNNFEK MIQTSRHHSNIPYVLD FPPQLWLPP-----  
H4\_Nav7 392 -----QNNVEK MIQTSRHYTNIPYVLD FPPQLWLPS-----  
H13\_Nav\_7 219 -----QINVEK MIQTSRHYTNIPYVLD FPPQLWLPS-----

H1\_Nav1 474 KKNQSLQSSPRRLMKRTSLYEDALLSGIME-NKDLLRRLLIEINRECPDLSLPYTKSQSQEASKVSGKQNNHSDMASNSSD GSLDPNHGQ  
H2\_Nav\_1 0  
H4\_Nav\_1 455 KSSGYIPPSHKRLMKRTSLYEDALLSGIIE-SKEILRQLRIAINKECPDLS---MQSVSNEASDTSGKQCNQSDMASDLS EGS LDHQGGQ  
H13\_Nav1 360 KSSGYIPPSHKRLMKRTSLYEDALLSGIIE-SKEILRQLRIAINKECPDLS---MQSVSNEASDTSGKQCNQSDMASDLS EGS LDHQGGQ  
H1\_Nav\_2 370 YGNHVLKIRNQGVLSSRSEGDIE MNLMK-----GRNGYNEEFKGLK NIGKPEQIPK-GNHIDQGS LKKEGK  
H2\_Nav\_2 370 YGNHVLKIRNQGVLSSRSEGDIE MNLMK-----GRNGYNEEFKGLK NIGKPEQIPK-GNHIDQGS LKKEGK  
H4\_Nav\_2 418 KLSNQIQQISSKESTQNSINERGIEMDLME-----GGKLRDRFRRHSGGLPSNSHKIVRSDDDRIGN  
H13\_Nav\_2 418 KLSNQIQQISSKESTQNSINERGIEMDLME-----GGKLRDRFRRHSGGLPSNSHKIVRSDDDRIRN  
H1\_Nav\_3 427 HNYDEELAPPDAYARNEDLGQTDNGLSPISLHNASTKNQHNHIGFTDEEGCITEHNDGPLQGRANCHDL DQGVKNGIDTLNSRRDEEE

H2\_Nav\_3 385 HNYDEELAPPDACARNEDLGQTDNGLSPISLHNAATKNQHNNIGFTDEEGCITEHNDGPLQGD RANCHDLQGGKVKNGIDTLNSRRDEEE  
H4\_Nav\_3 496 HKSDNLPTGSTNATNPTFEESNQRLRLQRPNSVSVSHGHNDIAFSKDKDDHINRNRNLVLDSPNHHHPNDLNSVNGMNGFQDLSVQP  
H13\_Nav\_3 496 HKSDNLPTGSTNATNPTFEESNQRLRLQRPNSVSVSHGHNDIAFSKDKDDHINRNRNLVLDSPNHHHPNDLNSVNGMNGFQDLSVQP  
H1\_Nav\_4 648 RRKNILPIVLSGIRSSISLNSRHLDEKEDPS-----EYKDENKPTISRELIAFHNHGNDCEGGDDIMP  
H2\_Nav\_4 203 RRKNILPIVLSGIRSSISLNSRHLDEKEDPS-----EYKDENKPTISRELIAFHNHGNDCEGGDDIMP  
H13\_Nav\_4 281 KRKNVIVLSMSGIRTSFSHFSREQDEENSG-----QLDAYIRSSATHELQNFHGNNDNCEYAAANSQOLA  
H4\_Nav\_4 375 DNRNILLNSLVSGRSSLSIHRHQDKHSSQN-----NSYEEESPVTHELHNIHEHDSNYEEAAADGQDLT  
H1\_Nav\_5 383 GHAGCFISIFYSRLAKKPKKPKQHQNKISV-----NQSKIIEPSPFSYNTINSNDEDNMRNDLNIIEI  
H2\_Nav\_5 318 GHAGCFISIFYSRLAKKPKKPKQHQNKISV-----NQSKIIEPSPFSYNTINSNDEDNMRNDLNIIEI  
H4\_Nav\_6 315 KRKNLLSAVTSNIVRSVSQLNLNQDGGAMT-----QRFSSFRKGSNASNEPTTECQNNGVSHVDIDVNSSM  
H13\_Nav\_6 315 KQKNLLSAVTSNIVRSVSQLNLNQDGGTIT-----QRFSSFRKGSNASNEPTTECQNNGVSHVDIDVNSFK  
H13\_Nav\_7 393 EPNVIFSIYHSSKRKSKKDNGAQSIRTDH-----SDCSYNHSVNTISHDKSGRDRQSNITIV  
H4\_Nav\_7 432 EPNVIFSIYHSSKRKSKKDNGAQSIRTDH-----SDCSYNHSVNTVSHDKSGRDRQSNITIV  
H4\_Nav7 424 EPVDLFSIYSSKRKIKKENRAQSINNDDH-----SGCSYNHSVNTISYDNTGRDRESNSII  
H13\_Nav\_7 251 EPVDLFSIYSSKRKIKKENRAQSINNDDH-----SGCSNNHSVNTISYDNTGRDRESNSIT

H1\_Nav1 563 SSQASSNSRHDKNKERRGANSISSLTSTELTNASSLSSTTIKQRESLELQILQKGEHHDHSEEREAAIITENDDTDK-----NDEDH  
H2\_Nav\_1 0 -----  
H4\_Nav\_1 541 SSQASSDSRHAKSEQR-GTNSVSSLTSTELTNASSL-----  
H13\_Nav1 446 SSQASSDSRHAKSEQR-GTNSVSSLTSTELTNASSLGGSGVTVKQRESMELELQILQKQKHNQAAEEKQTAIGSDDEDIHHNNSNNRNDKCN  
H1\_Nav\_2 440 INIISLKISAAIDDPKMQP-----  
H2\_Nav\_2 440 INIISLKISAAIDDPKMQP-----  
H4\_Nav\_2 482 FNFPKRNLDKSNKNGDKSN-----  
H13\_Nav\_2 482 VNFQKRNLDKSNKNGDKSN-----  
H1\_Nav\_3 517 TNEINRMENHDLPLVNIIDVVVCEKYIEEEDSKAKEMKMTDEDASKNLYPKSAKLNKIKEGEINTVQ-----  
H2\_Nav\_3 475 TNEINRMENHDLPLVNIIDVVVCEKYIEEEDSKAKEMKMTDEDASKNLYPKSAKLNKIKEGEINTVQ-----  
H4\_Nav\_3 586 TNDQNCARKYSLNQIDADTIAYLQHVQDENT-ANKLESIEEEDSODISAKLPPKRNQQQHPFPAQ-----  
H13\_Nav\_3 586 TNDQNCARKYSLNQIDADTIAYLQHVQDENT-ANKLESIEEEDSODISAKLPPKRNQQQHPFPAQNKFNNDISGQNTTPANKLESIEEEDS  
H1\_Nav\_4 710 IDDESEIRRN-----  
H2\_Nav\_4 265 IDDESEIRRN-----  
H13\_Nav\_4 346 NGDIRNQPN-----  
H4\_Nav\_4 438 NEDIRKRSSSNQSM-----  
H1\_Nav\_5 447 SEEVNGREYHNALKPAP-----  
H2\_Nav\_5 382 SEEVNGREYHNALKPAP-----  
H4\_Nav\_6 381 GNESEDENQPSSELYPIQ-----  
H13\_Nav\_6 381 GNESEDENQPSSELYPIQ-----  
H13\_Nav\_7 450 LSDINNNQDMDRSFGHDEL-----  
H4\_Nav\_7 489 LSDINNNQDMDRSFGHDEL-----  
H4\_Nav7 481 LSDINNNQDMDSRAFGHDEL-----  
H13\_Nav\_7 308 LSDINNNQDMDSRAFGHDEL-----

H1\_Nav1 646 HRPTQRKAADNDLDELINESTQLALRNITKSST--TSSNRGKNSAKASNGKRKESSELETSSIS----QAGFSLKRENSLIS-LN  
H2\_Nav\_1 0 -----  
H4\_Nav\_1 575 -----VMIAHRNAQKNSNISSNLAKRLATNRKINSAKRHENGSDASSIS----QAAFSLKSRDSSQIS-LD  
H13\_Nav1 535 GNSSVQKRMKVSDSLDDLINE SAMIAHRNAQKNSNISSNLAKGLATNRKINSAKRHENGSDASSIS----QAAFSLKSRDSSQIS-LD  
H1\_Nav\_2 459 -----HEGNSSSTKIENTALDNPINENRKTSSARYSALSRSDEID----RIKPNVVSVSHFTFTSKLS  
H2\_Nav\_2 459 -----HEGNSSSTKIENTALDNPINENRKTSSARYSALSRSDEID----RIKPNVVSVSHFTFTSKLS  
H4\_Nav\_2 501 -----IQRNQGHSYASKNTTSYSSNNHSKIATSSKYSNISRSDEGLN----KIKVAARETKPVTTYITN  
H13\_Nav\_2 501 -----IKRNQGHSYASKNTTSYSSNNHSKIATSSKYSNISRSDEGLN----EIKVAAREIKPVTTYITN  
H1\_Nav\_3 582 -----ISPDSGNNEENRHFVNVLKELOEYHTNRQTGRQDKLGSTELSSSLKKAATKIDQNHVDEDAGKGLDG  
H2\_Nav\_3 540 -----ISPDSGNNEENRHFVNVLKELOEYHTNRQTGRQDKLGSTELSSSLKKAATKIDQNHVDEDAGKGLDG  
H4\_Nav\_3 649 -----NKFNNDISGQNTTPHQAIISIELEDYHTTSAQRCDQNRDVSQPRPSTEAAATSNDRDSEMEEMKLNKDL  
H13\_Nav\_3 675 QDISAKLPPKRNQQQHPFPAQNKFNNDISGQNTSPHQAIISIELEDYHTTSAQKCDQNRDVSQPRPSTEAAATSNDRDSEMEEMKLNKDL  
H1\_Nav\_4 719 -----SNLSTSLHTP--NMSKANFDSVAHSDILEN----GYDNPYPAMASP---LP  
H2\_Nav\_4 274 -----SNLSTSLHTP--NMSKANFDSVAHSDVMEN----GYDNPYPAMARP---LP  
H13\_Nav\_4 354 -----SNLSATPHDDIIDLAKTGY--LTYDDNIK----KKDSSYYPVINRQ---LS  
H4\_Nav\_4 451 -----TPYENTDVAKTGYLTYDGVAN----KHNDAYYSVLRNQ---LS  
H1\_Nav\_5 463 -----ENVPERALESSLSANLRLKISLSDGGKK----NNSGSELLIPND---FS  
H2\_Nav\_5 398 -----ENVPERALESSLSANLRLKISLSDGGKK----NNSGSELLIPND---FS  
H4\_Nav\_6 397 -----TSIHDDDCMTGIDLQRHHLNFIHQDRSNNFLQVEAAYSRRRTSVVNDEVTLDH  
H13\_Nav\_6 397 -----TSIHDDDCMTGIDLQPHQLPNFIHQDRPNNFLQVEDAYSRRRTSVVNDEVTLDN  
H13\_Nav\_7 469 -----DTITSPENEGIDMLRMQNNVTENNVPDN----NNSTSNYLLFSSGSDVLR  
H4\_Nav\_7 508 -----DTITSPENEGIDMLRMQNNVTENNVPDN----NNSTSNYLLFSSGSDVLR  
H4\_Nav7 500 -----DTITDTPENERMIDMLTMQNNVTD-----KNSTSNYLLFSSSEADVLP  
H13\_Nav\_7 327 -----DTIDASPENERMIDMLTMQNNVTD-----KNSTSNYLLFSSSEADVLP

H1\_Nav1 728 AK-----APNKARESIGGFAEPAIAEAKELVSISENG-DPAMSDSVTDPSIPRVGK-----PCWQTFRSPINKIVTDPLFDLII  
H2\_Nav\_1 1 -----MSDSVTDPSIPRVGK-----PCWQTFRSPINKIVTDPLFDLII  
H4\_Nav\_1 638 AK-----AIANAKEAINGFTEPTIAEDKEHTSIESQNEEDPPINDSVTDPSIPQIGK-----PCWLTQKPIGKIVTDPLFELTI  
H13\_Nav1 619 AK-----ATANAKEATNGFTEPTIAEDKEHTSIESQNEEDPPINDSVTDPSIPQIGK-----PCWLTQKPIGKIVTDPLFELTI  
H1\_Nav\_2 520 AA-----NKIGNNGEVNGKSPSTLMKKREKVIIRLVP EGGQSSGSATVTTVSIVLNAETTSTKS---TIWRQIRVLVGRIVDDSLFELFI

H2\_Nav\_2 520 AA-----NKIGNNGEINGKSPSTLMKKREKVIIRLVEEGGQSSGSATVTTVSIVLNAETTSTKS----TIWRQIRVLVGRIVDDSLFLFI  
H4\_Nav\_2 562 AI-----HRIHSRPSVRSESNLGTPKNREKIVRLSDYGDSSSSNAMITTVSVLNTQRTSKS-----ASWRRARVMVCTFVDDGLFLFI  
H13\_Nav\_2 562 AI-----HRIHSRPSLRSESNLGTPKNREKIVRLSDYGDSSSSNAMITTVSVLNTQRTSKS-----ASWRRARVMVCTFVDDGLFLFI  
H1\_Nav\_3 651 AV-----ARRDLRISVRV-AKTSTIKSKHVEVLLPPPSVSEGEVKSLDGHNTKDKSEDDQNL-----SCFGRFRKRLRSIFLSPLYEPAM  
H2\_Nav\_3 609 AV-----ARRDLRISVRV-AKTSTIKSKHVEVLLPPPSVSEGEVKSLDGHNTKDKSEDDQNL-----SCFGRFRKRLRSIFLSPLYEPAM  
H4\_Nav\_3 718 KNRDLRRSFVHSRKQVPRQSIDSLNTRSELVNEIPQRALRGNVANSVGHPRDRISLNSSTRHDEDSGQFCCKQLSHFLKSPLYEPAM  
H13\_Nav\_3 765 KNRDLRRSFVHSRKQVPRQSIDSLNTRSELVNEIPQRALRGNVANSVGHPRDRISLNSSTRHDEDSGQFCCKQLSHFLKSPLYEPAM  
H1\_Nav\_4 762 AS-----PHLSVPM-----QSNIVARNHW-----IQFTTLNCVAVRAAPTAKK-----TVWKRFRKVLKIVQNVLFEIFI  
H2\_Nav\_4 317 AS-----PYLSVPM-----QSNIVARNHW-----IQFTTLNCVAVRAAPTAKK-----TVWKRFRKVLKIVQNVLFEIFI  
H13\_Nav\_4 397 VS-----PYLSSNRKANLSSSNG--RNIKISQIKRPOAELTTLNCVVAIRSVPTQR-----TIWKRFRKILLKITQHVLFIVI  
H4\_Nav\_4 489 VS-----SYLSDNKT---ASQSSLTRKQDKKSKAKRPRAELTTLNCVVTIRSVPTPRK-----TIWRRFRKILLKITQHVLFIVI  
H1\_Nav\_5 509 DK-----LSINGREINLSKASNQSI RMNEN-----RSKPPYVFM----YFIILM  
H2\_Nav\_5 444 DK-----LSINGREINLSKASNQSI RMNEN--RNSLGMVEYTTLNCVIAIHAVATTKK-----SANEKIRKFLKIVQSVTFEIFM  
H4\_Nav\_5 451 TAGG---TTVHDEVILDGRARGQSIKRKR--QDPQGRIOCTTLNCIVAVHAVPTTKR-----SKWEFIKKVLLKIVQNTCFEFIM  
H13\_Nav\_6 451 TAGG---TTVHDEVILDGVASGQSIKRKR--QDPQGRIOCTTLNCIVAVHAVPTTKR-----SKWEFIKKVLLKIVQNTCFEFIM  
H13\_Nav\_7 517 SN-----SPMTARDHLLRRTYGETVNKKEN--RDEQGIIELTTLNCVAVHAVAPSKK-----PMKEKMQRFLLKVIQNFLEFII  
H4\_Nav\_7 556 SN-----SPMTARDHLLRRTYGETVNKKEN--RDEQGIIELTTLNCVAVHAVAPSKK-----PMKEKLRKFLKVIQNFLEFII  
H4\_Nav7 544 SN-----APMTARDEHLLRRTYSETVKKKEN--RDEQGMVELTTLNCVAVHAVAPSKK-----PMQEKIRKFLKIIQNFLEFII  
H13\_Nav\_7 371 SN-----APMTARDEHLLRRTYSETVKKKEN--RDEQGMVELTTLNCVAVHAVAPSKK-----PMKEKIRKFLKIIQNFLEFII

H1\_Nav1 803 TFCIALNTLFMALYQPNPR-NDPGKASLNNVIQIANYVFTGIFTLEMVLLKIAFTPSGYISSKWNVFDGLVVIISYLDLFDLSTILQQR-  
H2\_Nav\_1 40 TFCIALNTLFMALYQPNPR-NDPGKASLNNVIQIANYVFTGIFTLEMVLLKIAFTPSGYISSKWNVFDGLVVIISYLDLFDLSTILQQR-  
H4\_Nav\_1 714 TFCIGLNTLFMALYQPNPL-NDPGKASFNNAIQVANYVFTGIFTLEMVLLKIVFTPSGYISSKWNIFDGLVVIISYLDLFDLSAILRQNR-  
H13\_Nav1 695 TFCIGLNTLFMALYQPNPR-NDPGKASFNNAIQVANYVFTGIFTLEMVLLKIVFTPSGYISSKWNIFDGLVVIISYLDLFDLSAILRQNR-  
H1\_Nav\_2 601 TGCIIINTILMSMYQPLEE-YNSKVPAQN---IDNYVFTCIFTTEMTLKLIAFGFTGYIQSKWNVFDGIVVIISLVLDLLEFISISSN-  
H2\_Nav\_2 601 TGCIIINTVLSMYQPLEE-YNSKVPAQN---IDNYVFTCIFTTEMTLKLIAFGFTGYIQSKWNVFDGIVVIISLVLDLLEFISISSN-  
H4\_Nav\_2 642 TGCIIISNTILMSMYQPLEE-YNSQPVQN---IDNYVFTGIFTIEMILKLFAYGFCGYINSKWNVFDGVVVIISLVLDLLEFISVSSN-  
H13\_Nav\_2 642 TGCIIISNTILMSMYEPLKE-YNSQPVQN---IDNYVFTGIFTIEMILKLFAYGFCGYINSKWNVFDGVVVIISLVLDLLEFISVSSN-  
H1\_Nav\_3 730 EIFVIIDSTVMALYIPLDDKSQWRI-----ITIIYVLSGIFVMEVTLKLIARHPQFIKSKWIDFDLITLPTLAQAAILITGVKETE  
H2\_Nav\_3 688 EIFVIIDSTVMALYIPLDDKSQWRI-----ITIIYVLSGIFVMEVTLKLIARHPQFIKSKWIDFDLITLPTLAQAAILITGVKETE  
H4\_Nav\_3 808 SIIIVIELTVMALYIPLPEPEFEPRT-----IIYILSGIFALETVLKFIAFGPRRFIKNKWIDFDLIVFPTSQAAILMIIGLKETE  
H13\_Nav\_3 855 SIIIVIELTVMALYIPLPEPEFEPRT-----IIYILSGIFALETVLKFIAFGPRRFIKNKWIDFDLIVFPTSQAAILMIIGLKETE  
H1\_Nav\_4 825 MSCVLADFVIAISNPLEP-KFWES-----MAEYVFAALFFVEMILKLIASPRCYVKDSWNILDGVMITIGLVDVILILARISSP-  
H2\_Nav\_4 380 MSCVLADFVIAISNPLEP-KFWES-----MAEYVFAALFFVEMILKLIASPRCYVKDSWNILDGVMITIGLVDVILILARISSP-  
H13\_Nav\_4 470 MACVIADFVIAISNPLYP-NRLED-----LLEFIFSFIFCGELIKLIASPKCYMQSRWNILDVVTIIGLIDITLTLANIHS-  
H4\_Nav\_4 562 MACVIADFVIAISNPLHR-NLWED-----ILGYIFSIFFGEMVLLKLIASPKCYMQSSWNILDFTLTNIGLIDITLTLANIHS-  
H1\_Nav\_5 549 ITCVLCDFVILALSPLTP-WPWEM-----YVGYAFASLFFVEMVLLKLIASPRCYVKDSWNILDVIVTVIGIVDVLTLMQISTA-  
H2\_Nav\_5 518 ITCVLCDFVILALSPLTP-WPWET-----YVGYAFASLFFVEMVLLKLIASPRCYVKDSWNILDVIVTVIGIVDVLTLMQISTA-  
H4\_Nav\_6 527 MTAVITDFVILAI SNMYP-WWNEA-----YVSSGFALLFTLEMILKLIASPRCYVKDSWNILDVIVTVIGLNMVFTLLYILSP-  
H13\_Nav\_6 527 MTAVITDFVILAI SNMYP-WWNEA-----YVSSGFALLFTLEMILKLIASPRCYVKDSWNILDVIVTVIGLNMVFTLLYILSP-  
H13\_Nav\_7 591 NSCIITDFVILAI SNPLSP-WPWEN-----SVSIAFAFLFLEMILKLIASPRCYFRDKWNILDVIVTVIGIVDAFLSIAQVPAA-  
H4\_Nav\_7 630 NSCIITDFVILAI SNPLNP-WPWEN-----GVSNGFAFLFLEMILKLIASPRCYFRDKWNILDVIVTVIGIVDAFLSIAQVPAA-  
H4\_Nav7 618 NSSIITDFVILAI SNPLYP-WQWEN-----GVGIGFAFLFLEMILKLIASPRCYFKHKWNILDVIVTVIGLVDAILTIAQVPAA-  
H13\_Nav\_7 445 NSSIITDFVILAI SNPLYP-WQWEN-----GVGIGFAFLFLEMILKLIASPRCYFKHKWNILDVIVTVIGLVDAILTIAQVPAA-

H1\_Nav1 890 -GLAVLRTRFRLLRVFKLAQSWTAMRTLVRRAIVRSLSAIFYVTLILFLVLYVFAVLGMKIFRQPYLNYSTVNFPRWNFNFFDSFMLIFR  
H2\_Nav\_1 127 -GLAVLRTRFRLLRVFKLAQSWTAMRTLVRRAIVRSLSAIFYVTLILFLVLYVFAVLGMKIFRQPYLNYSTVNFPRWNFNFFDSFMLIFR  
H4\_Nav\_1 801 -GLAVLRTRFRLLRVFKLAQSWTAMRTLVRRAIVSSLSAIFYVTLIMFLVLYVFAVLGMQIFRQPYLNHYSSASFPRWNFNFFDSFMLIFR  
H13\_Nav1 782 -GLAVLRTRFRLLRVFKLAQSWTAMRTLVRRAIVSSLSAIFYVTLIMFLVLYVFAVLGMQIFRQPYLNHYSSASFPRWNFNFFDSFMLIFR  
H1\_Nav\_2 684 -SLSVLRTRLLRVFKLARSWTTMRRLLSTIVSGAKALLYILLILITIIYVFAVLGMKIFRDAYRKHFE--NLPRWNFFDDFIDSFMMIFR  
H2\_Nav\_2 684 -SLSVLRTRLLRVFKLARSWTTMRRLLSTIVSGAKALLYILLILITIIYVFAVLGMKIFRDAYRKHFE--NLPRWNFFDDFIDSFMMIFR  
H4\_Nav\_2 725 -SLSVLRTRLLRVFKLARSWTTMRRLLTTIASGAKALLYVLLILITIIYVFAVLGKIFRTAYREHFH--PMPRWNFFDDFIDSFMMIFR  
H13\_Nav\_2 725 -SLSVLRTRLLRVFKLARSWTTMRRLLTTIASGAKALLYVLLILITIIYVFAVLGKIFRTAYREHFH--PMPRWNFFDDFIDSFMMIFR  
H1\_Nav\_3 812 WIIAALVTLRVTRIFRLARTWPAMYRLRLTLIFNMSALIYVNLMMVIFIIYIFAVLGQKMFDRDAYRKKFT--EMPRFNFDNFESSCMMIFR  
H2\_Nav\_3 770 WIIAALVTLRVTRIFRLARTWPAMYRLRLTLIFNMSALIYVNLMMVIFIIYIFAVLGQKMFDRDAYRKKFT--EMPRFNFDNFESSCMMIFR  
H4\_Nav\_3 890 FVIALLVTLRVIRIFRLGRTWTAMRYLLRLTVSNMSALIYVNLMMVIFIIYIFAVLGQKFFQTAYQNYKD-NLPQFHFNDLSSCMMIFR  
H13\_Nav\_3 937 FVIALLVTLRVIRIFRLGRTWTAMRYLLRLTVSNMSALIYVNLMMVIFIIYIFAVLGQKFFQTAYQNYKD-NLPQFHFNDLSSCMMIFR  
H1\_Nav\_4 904 -ATSALKTLRVFRIFKLAKTWEAMRRLTLALGNSMTAIMYVGLMVLIIYIFAVMGMKLFKKSYEKKFGK-NQPRFNFDLPDAFILIFR  
H2\_Nav\_4 459 -ATSALKTLRVFRIFKLAKAWKAMRRLTLALGNSMTAIMYVGLMVLIIYIFAVMGMKLFKKSYPYKFKG-NQPRFNFDLPDACLIFR  
H13\_Nav\_4 549 -ATSALKTLRVLRVFKLAKSWTMRRELSAIGSMSGLGYVGLMMIYIYIFAVMGMKLFKAYHNKFGS-TQPRFNFDFAEACMLIFR  
H4\_Nav\_4 641 -ITSALKPLRVLRVFKLARTWGMARLTLTAVGKLSAISYVGLMMLIYIYIFAVMGTKLFKKSAYAVKFGK-LQPRYNFDSFAESCLVVF  
H1\_Nav\_5 628 -TVNALRTRVFRVFKLAKSWPAMRKLLSALGKSSAIMYIGLMVLIYIYIFAVLGKLFEPGYKTFGK-NQPRFNFDGFFNSCLVIFR  
H2\_Nav\_5 597 -TVNALRTRVFRVFKLAKSWPAMRKLLSALGKSSAIMYIGLMVLIYIYIFAVLGKLFEPGYKTFGK-NQPRFNFDGFFNSCLVIFR  
H4\_Nav\_6 606 -ATSALKTLRVLRVFKLAKSWPAMRKLLSALGMSLSAIMYVGLLLIYIYIFAVLGKLFQARYRYVFGS-NQPRFNFNFDLACMLIFR  
H13\_Nav\_6 606 -ATSALKTLRVLRVFKLAKSWPAMRKLLSALGMSLSAIMYVGLLLIYIYIFAVLGKLFQARYRYVFGS-NQPRFNFNFDLACMLIFR  
H13\_Nav\_7 670 -IINVLKAFRVFRIFKLAKSWSAMRRIMLALGKMSAIGYVGLLVLIIYIYIFAVLGKLFQPFYKHKFKS-KQPQFNFDGFFNACLIFR  
H4\_Nav\_7 709 -IINVLKAFRVFRIFKLAKSWSAMRRIMLALGKMSAIGYVGLLVLIIYIYIFAVLGKLFQPFYKHKFKS-KQPQFNFDGFFNACLIFR  
H4\_Nav7 697 -IVNLKTRFRVFRIFKLAKSWSAMRRIMLALGKMSAIGYVGLMVLIIYIYIFAVLGKLFQPFYKHKFKS-KQPQFNFDGFFNACLIFR  
H13\_Nav\_7 524 -IVNLKTRFRVFRIFKLAKSWSAMRRIMLALGKMSAIGYVGLLVLIIYIYIFAVLGKLFQPFYKHKFKS-KQPQFNFDGFFNACLIFR

DII

H1\_Nav1 980 VLCGEWIEPLYEAMRATNP-ASIIFFISAYVIGNLLVNLFLALLLSSFENVSFTET-----YDQDTIINRRRASPMSIALR-LAQI  
H2\_Nav\_1 217 VLCGEWIEPLYEAMRATNP-ASIIFFISAYVIGNLLVNLFLALLLSSFENVSFTET-----YDQDTIINRRRASPMSIALR-LAQI  
H4\_Nav\_1 891 VLCGEWIEPLYEAMQATNP-ASIIFFISAYVIGNLLVNLFLALLLSSFENVSFTET-----YDQDTIINRRRASPMSIALR-LAQI  
H13\_Nav1 872 VLCGEWIEPLYEAMQATNP-ASIIFFISAYVIGNLLVNLFLALLLSSFENVSFTET-----YDQDTIINRRRASPMSIALR-LAQI  
H1\_Nav\_2 772 ILCGEWIEPLYDAIQATNI-SSILFFLAAYVVGKLLVHLFLALLLSSFENQSFQEA-----YSVNSG--SQKNGNLYDALRYLIVT  
H2\_Nav\_2 772 ILCGEWIEPLYDAIQATNI-SSILFFLAAYVVGKLLVHLFLALLLSSFENQSFQEA-----YSVNSG--SQKNGNLYDALRYLIVT  
H4\_Nav\_2 813 ILCGEWIEPLYDAIKATNI-SAILFFLSVYVVGKLLVHLFLALLLSSFENQSFQDA-----YSINSG--SQKNSGYREAFQYLIVT  
H13\_Nav\_2 813 ILCGEWIEPLYDAIKATNI-SAILFFLSVYVVGKLLVHLFLALLLSSFENQSFQDA-----YSINSG--SQKNSGYRYAFQYLIVT  
H1\_Nav\_3 900 IMCGEWIQPLGVAVKATSS-WAIVFFLMVFLIGNLLVNLFLVALILSTLEDQSFQEK-----YNTENDSHLDQN-----FMHQ  
H2\_Nav\_3 858 IMCGEWIQPLGVAVKATSS-WAIVFFLMVFLIGNLLVNLFLVALILSTLEDQSFQEK-----YNTENDSHLDQN-----FMHQ  
H4\_Nav\_3 979 IMCGEWKQPLTQAIKATNV-WAIIFFLTVFIVGNLLVNLFLVALILNTELEDQSFHEK-----YNSENKEKPPQT-----LMEK  
H13\_Nav\_3 1026 IMCGEWKQPLTQAIKATNV-WAIIFFLTVFIVGNLLVNLFLVALILNTELEDQSFHEK-----YNSENKEKPEQT-----LMEK  
H1\_Nav\_4 993 ILCGEWSDPISNAVKATNSYASITFFVAVYVIGNLLVNLFLALLLSSLEDASEDDN-----NSNGTKNDEGVSrneKSSFFRRFLGP  
H2\_Nav\_4 548 ILCGEWSDPISNAVKATNSYASITFFVAVYVIGNLLVNLFLALLLSSLEDASEDDN-----NSNGTKNDEGVSrneKSSFFQKFLGP  
H13\_Nav\_4 638 ILCGEWSDPIKDAVAATGSYASIIFFILAYVIGNLLVNLFLALLLSSLEDKSSDEN-----NNVDNTEENSSNEQKPLSCVQKFLNF  
H4\_Nav\_4 730 ILCGEWSEPATNAVRATGSYASVLFIIAYIIGNLLVNLFLALLLSSLEEASDES-----NVDETDEDSLENKASPSFFRKFQF  
H1\_Nav\_5 717 IICGEWSPVNDIAIKATGSYVSIVFFLSAYIIGNLLVNLFLAMLLSLENASIEEDSINNGEVNncnngDNDNDKKEGLTRMQRMSRA  
H2\_Nav\_5 686 IICGEWSPVNDIAIKATGSYVSIVFFLSAYIIGNLLVNLFLAMLLSLENASIEEDSINNGEVNncnngDNDNDKKEGLTRMQRMSRA  
H4\_Nav\_6 695 ILCGEWSDPIHDIAIHATGSHVVILFFITAYIIGNLLVNLFLALLLSSLEASNTDDE-----NSTNEKESDAKNEEQPKSRLQQLRQS  
H13\_Nav\_6 695 ILCGEWSDPIHDIAIHATGSHVVILFFITAYIIGNLLVNLFLALLLSSLEASNTDDV-----NSTNEKESDAKNEEQPKSRLQQLRQS  
H1\_Nav\_7 759 ILCGEWSPVHDIAIKATRSFVPIIFFVIAYVIGNLLVNLFLALLLDSLQDASSNEDD-----HSYENESSSLASHSKDLTLPQKFYRV  
H4\_Nav\_7 798 ILCGEWSPVHDIAIKATRSFVPIIFFVIAYVIGNLLVNLFLALLLDSLQDASSNEDD-----HSYENESSSLASHSKDLTLPQKFYRV  
H4\_Nav7 786 ILCGEWSPVHDIAIKATRSFVPIIFFVIAYVIGNLLVNLFLALLLDSLQDASSNEDD-----HSYENESSSLASHSKDLTLPQKFYRV  
H13\_Nav\_7 613 ILCGEWSPVHDIAIKATRSFVPIIFFVIAYVIGNLLVNLFLALLLDSLQDASSNEDD-----HSYENESSSLASHSKDLTLPQKFYRV

H1\_Nav1 1061 LRADKLYFYMR AHFGCCRAEVAEINPP-----NKEDESSVISQSIVMDPIDLGYPG-SSLPIQQGKVFKL  
H2\_Nav\_1 298 LRADKLYFYMR AHFGCCRAEVAEINPP-----NKEDESSVISQSIVMDPIDLGYPG-SSLPIQQGKVFKL  
H4\_Nav\_1 972 TRIDKLYWYIRRCCKCPTTQVLEINPPSN-----IDDMSSVLSQSITIQPDEFYGPGTAPLSMPQAKVYKL  
H13\_Nav1 953 TRIDKLYWYIRRCCKCPTTQVLEINPPSN-----IDDMSSVLSQSITIQPDEFYGPGTAPLSMPQAKVYKL  
H1\_Nav\_2 852 LRLNKLWNYTFA-----RI  
H2\_Nav\_2 852 LRLNKLWNYTFA-----RI  
H4\_Nav\_2 893 LRLDKLWKYTFG-----KL  
H13\_Nav\_2 893 LRLDKLWKYTFG-----KL  
H1\_Nav\_3 972 LK----SIFTSSCCFKKESVDARPLDLESNQNHLYLT-----VFNDSESMTDSVDQETETQLVELSDHSRNGDNIGRRNKL  
H2\_Nav\_3 930 LK----SIFTSSCCFKKESVDARPLDLESNQNHLYLT-----VFNDSESMTDSVDQETETQLVELSDHSRNGDNIGRRNKL  
H4\_Nav\_3 1051 IK----AAFATTCCCLKKKNKAD-----DIEQISNQL EYNQSRFNVTIFNDSDDSSVSLNDRPETQI  
H13\_Nav\_3 1098 IK----AAFATTCCCLKKKNKAD-----DIEQISNQL EYNQSRFNVTIFNDSDDSSVSLNDRPETQI  
H1\_Nav\_4 1076 IRNSKICSLARCHCSLSKRKHSLSDSDESVPSDDRREFSTSKSDSRQAYIDPIADDASLADTVSFDNHVIRINTGNSFLSNKAE--NR  
H2\_Nav\_4 631 IRNSKICSLARCHCSLSKRKHSLSDSDESVPSDDRREFSTSKSDSRQAYIDPIADDASLADTVSFDNHVIRINTGNSFLSNKAE--NR  
H13\_Nav\_4 720 LKIGQGCCFYKSCCDSRKSNSLEQNNASTDQQDDYH-----HPTPIDGSQADTISFDNYPARLQAEGNSSTTEVDHMAM  
H4\_Nav\_4 813 LKIEQGCWFC SKYCCHSKTPDSNLEDNRVPPGQTDHDD-----NPAQIDRSQNDTISFDNYPAIVQPEINSLTIEIDHPAT  
H1\_Nav\_5 807 MKVDRVWATLTPCYHHSRKEKDSKCSDEEELISVP ISTANENKIASETS IYHTESENAYTNQDGPDTKSNDSNLDQMAIDDNGNLMIR  
H2\_Nav\_5 776 MKVDRVWATLTPCYHHSRKEKDSKCSDEEELISVP ISTANENKIASETS IYHTESENAYINQDGPDTKSNDSNLDQMAIDDNGNLMIR  
H4\_Nav\_6 779 LRFENACIYL TNMVCVCFKTCGSKNQHGTC A-----WFRNKLGLWLNTRNSNKQKEMGLEKIATVEAANGK--SS  
H13\_Nav\_6 779 LRFENACIYL TNMVCVCFKTCGSKNQHGTC A-----WFRNKLGLWLNTRNSNKQKEMGLEKIATVEAANGK--SS  
H1\_Nav\_7 843 FKLD RVSEMLC RCNRKRDHQSDIEQDQISNFFTNVGDISNPTNIG-----YSRPRRSAYS IQDIAMGHTNMDYHDHTNRSNVDVADSSF  
H4\_Nav\_7 833 -----MDYHDHTNRSNVDVADSSF  
H4\_Nav7 870 FKLD RVSEMF C RCNRKRDHQSDIEQDQISNFFSIIGDISDPTNIG-----YPRSQSAYS NQDNPMGHTNMYYHDHTDRGDNVADSTF  
H13\_Nav\_7 697 FKLD RVSEMLC RCNRKRDHQSDIEQDQISNFFTNVGDISNPTNIG-----YSRPRRSAYS IQDIAMGHTNMDYHDHTNRSNVDVADSSF

H1\_Nav1 1126 EPIPRKTS DAPSRSITDLRGFIIPSAQ-----DLQSRKSVPNISL--QGHLRGMTQDLRN-TTR-----  
H2\_Nav\_1 363 EPIPRKTS DAPSRSITDLRGFIIPSAQ-----DLQSRKSVPNISL--QGHLRGMTQDLRN-TTR-----  
H4\_Nav\_1 1040 EPIR-RKTS DTPSKSTANLRNLVVP T AQ-----DLQSRQSVPNIGL--QGSNLLKLTQDLRN-TTR-----  
H13\_Nav1 1021 EPIR-RKTS DTPSKSTANLRNLVVP T AQ-----DLQSRQSVPNIGL--QGSNLLKLTQDLRN-TTR-----  
H1\_Nav\_2 866 LPQKKT PKPKPKLESAG-----NVNLASSNY-NPQI--LQHTEILKDENNRRN-GLD-----  
H2\_Nav\_2 866 LPQKKT PKPKPKLESAG-----NVNLASSNY-NPQI--LQHTEILKDENNRRN-GLD-----  
H4\_Nav\_2 907 LPVKTAKPQPQIANALA-----NINLATVNYNAQGR--SNMDELLATNHL D-----  
H13\_Nav\_2 907 LPVKTAKPQPQIANALA-----NINLATVNYNAQGL--SNMDELLATNLLD-----  
H1\_Nav\_3 1043 LKSDGREIDDEIQVQVSVEQNLVDNSIKVST DQASNQGYKVEHNNNSKSKS--FQT NATMAKINNEG-SYRDEL-----  
H2\_Nav\_3 1001 LKSDGREIDDEIQVQVSVEQNLVDNSIKVST DQASNQGYKVEHNNNSKSKS--FQT NATMAKINNEG-SYRDEL-----  
H4\_Nav\_3 1107 IELNDITNENQKKDEIK-MPALVEQDI-----NGSHIELSFDHQDC--SQDDTYLLKYSKSTP-----  
H13\_Nav\_3 1154 IELNDITNENQKKDEIK-MPALVEQDI-----NGSHIELSFDHQDC--SQDDTYLLKYSKSTP-----  
H1\_Nav\_4 1164 DETDSAMNHANRNGN ILMNPSTDSNNHSMDEHLRLNHSQLIQQSLSTAHLPSKSKDEYIAEVELDK-GLNCPNPSNDQLEVKLTATDKST  
H2\_Nav\_4 719 DETDSAMNHANRNGN ILMNPSTDSNNHSMDEHLGINSQLIQQSLSTAHLPSKSKDEYIAEVELDK-GLNCPNPSNDQLEVKLTATDKST  
H13\_Nav\_4 796 IDLNRSTNSLNRNENAIHHR LQTSNNNSTDRFDKADVSAYDNGLQLSQL--IQNSENRDKQNMDDIDLDKTNSSPYMDNLQKQATND--  
H4\_Nav\_4 889 LDINKPINS LDANQNATANLQLQTDHNNNSVDNVDKVDMPGNDGHQSLSI--QKAKTINIENKDDSDLDKST-----  
H1\_Nav\_5 897 NPIK-LTSETLMTSNTTNSPILIEAENDKVDINSQKEQPIITKDF-NANI--EKNEQIGNHHQIKS-GTSGETNRNSSRNSIERDPHS--  
H2\_Nav\_5 866 NPIK-LTSETLMTSNTTNSPILIEAENDKVDINSQKEQPIITKDF-NVNI--EKNEQIGNHHQIKS-GTSGETNRNSSRNSIERDPHS--  
H4\_Nav\_6 845 QGKIEMSENGFGSQDLTTEFTDIKHSDSWYDTT---EVITTEKVAVDPSL--NKRLSHTLAIDVQC-NDSRDQSI LHDNVPQQLTNQSP  
H13\_Nav\_6 845 QGKIEMSENGFGSQDLTTEFTDIKHSDSWYDTT---EVITTEKVAVDPSL--NKRLSHTLAIDVQC-NDSRDQPTLHDNIPTQQLTNQSP

H13\_Nav\_7 926 NTISAVSKNQFSAESITNKPYTITDDRS--DNLDINNVARVKDSHTMPDI---ANEHGLNYSYIEH-DHELQHSVYANDITNATACME--  
 H4\_Nav\_7 853 NTISAVSKNQFSAESITNKPYTITDDRS--DNLDINGVAYVKDSHTMPDI---ANEHGLNYSYIKQ-DLELQHSVYDNDITNATACME--  
 H4\_Nav7 953 NTIPAIKSKNQFSAESITNKPYVTGDRS--DNLDINDVAYVKDSHTMPDI---ANEHGLTHSITKQ-DHELHHSLNANDIANATVCM--  
 H13\_Nav\_7 780 NTISAVSKNQFSAESITNKPYTITDDRS--DNLDINNVARVKDSHTMPDI---ANEHGLNYSYIEH-DHELQHSVYANDITNATACME--  
  
 H1\_Nav1 1184 -----SKNSVQTIPIESKI-EFMAVNASNRSSNNE SDY-  
 H2\_Nav\_1 421 -----SKNSVQTIPIESKI-EFMAVNASNRSSNNE SDY-  
 H4\_Nav\_1 1097 -----SRNNVQAVSIESKI-HSMAKHASNKILHHDHY-  
 H13\_Nav1 1078 -----SRNNVQAVSIESKI-HSMAKHASNKILHHDHY-  
 H1\_Nav\_2 912 -----EINTLSRSIAE EKI-STSANNGKGGQSSSKDPKL-  
 H2\_Nav\_2 912 -----EINTLSRSIT E EKI-STSANNGKGGQSSSKGPKL-  
 H4\_Nav\_2 950 -----RKFNLTLDTRNNLQ-ENVGISNQAEQE PSSKDC-  
 H13\_Nav\_2 950 -----RKFNLTLDTRNNLQ-ENAGISNQAEQE PYSKDR-  
 H1\_Nav\_3 1112 -----ERFSILSESETSYA-NRMTLSSADLDESQIDV-  
 H2\_Nav\_3 1070 -----ERFSILSESETSYA-NRMTLSSADLDESQIDV-  
 H4\_Nav\_3 1160 -----RQSKSDIKQLTENN-SQCGINMIDPLSTSNVDS-  
 H13\_Nav\_3 1207 -----RQSKSDIKQLTENN-SQCGINMIDPLSTSNVDS-  
 H1\_Nav\_4 1253 KPVVENDESPTLTTEIEVEASPNAELGLTSKNKSVSDSHITNKSLTKSMASDARKSRKKRFHRNKSTTNQ-ANIARKDSEIHELQOEKRP  
 H2\_Nav\_4 808 KPVVENDESPTLTTEIEVEASPNAELGLTSKNKSVSDSHITNKSLTKSTASDARKSRKKRFHRNKSTTNQ-ANITRKDSEIHELQOEKRP  
 H13\_Nav\_4 881 -VVTHGSMRKNHDLGHNNIAADIEVINTAVPIADNHTIDD SKKLP RSIQADPVKSRRLFGRRRTAAGL-KKNRMNDSQNQNVQKKEP  
 H4\_Nav\_4 958 -----SLHNIENCCKQKQTI-TDDTITHNSMK SINQRH-  
 H1\_Nav\_5 979 -----LTTLHSNNIEGASIHGVAILN-PNTVEQTNVKKRKM LFSGRLSQSKSTPQMKQ-NIELKESPPKIGRRVAINRLKPLKFNRRV-  
 H2\_Nav\_5 948 -----LTTLHSNNIEGASIHGVAILNPNTVEQTNVKKRKM LFSGRLSQSKSTPQMKQNI ELKESPPKIG-RRVAIRRLKPLKFNRRV-  
 H4\_Nav\_6 929 NERPIDDKISVYATKI-----RDLQYDDRTNRLSH-ENFNMNKSGLHTGLHDKF-  
 H13\_Nav\_6 929 NERPIDDKRSVHATKI-----RDLQYDDRTNRLSH-ENFNMNKSGLHTGLHDKF-  
 H13\_Nav\_7 1007 -----ENNVSSENVNLEQIQPDNTVNGPSFHPQMNIKKRQNFRRQKMENE STNQIKRRGVPLVRKMF-TKHSAVNEKFINSVDDHCS  
 H4\_Nav\_7 934 -----ENAVSSENMNLEQIQPDNTVNGPSFHPQMNIKKRQNFRRPKIGNE STNQIKRRGVPLVRKMF-RKHFVNEFTTSSVDDNNS  
 H4\_Nav7 1034 -----ENNVSSQNVNLEQIQPDKTVNGHSLHPQINVKRRQNLFRQKIDNE STNQIKRTNVPLVRRLMR-KRSAVNEKFANGSVDDHNS  
 H13\_Nav\_7 861 -----ENNVSSENVNLEQIQPDNTVNGPSFHPQMNIKKRQNFRRQKMENE STNQIKRRGVPLVRKMF-TKHSAVNEKFINSVDDHCS  
  
 H1\_Nav1 1216 -----PVDLHNKVVYATSS-----KKNGLLSTNSNGKALSASCNHL PVGTRHH  
 H2\_Nav\_1 453 -----PVDLRNKVVYATSS-----KKN DGLLSTNSNGKALSASCNHL PVGTRHH  
 H4\_Nav\_1 1129 -----SDDLHSHSDSYTHSQR-----K DSTDHLHVQGNAQILSASFHLPNGGSS-  
 H13\_Nav1 1110 -----SDDLHSHSDSYTHSQR-----K DSTDHLHVQGNAQILSASFHLPNGGSS-  
 H1\_Nav\_2 944 -----LVEYNESALVSDQPQR-----KKSANHREVRNTLSDGDAHSA CDYNYN-  
 H2\_Nav\_2 944 -----LVEYNESALVSDQPQR-----KKSANHREVRNTLSDGDAHSA CDYNYN-  
 H4\_Nav\_2 982 -----KLLSIEYRPTLTSDKQKQR-----EQNNQHLQVRHTVSDSDGRMSDCS-  
 H13\_Nav\_2 982 -----KLLSIEYRPTLPSDKQKQR-----EKNNQHLQVRHTVSDSDGHSISDCS-  
 H1\_Nav\_3 1144 -----AKGYDRIEHHLHQSE-----QESTLISMIPYNESTITPKKSTINDTKESE  
 H2\_Nav\_3 1102 -----AKGYDRIEHHLHQSE-----QESTLISMIPYNESTITPKKSTINDTKESE  
 H4\_Nav\_3 1192 -----HKEMNDNINESKEEST-----IVPATLNDESTLIAQVSNAAEIQVSDQ-  
 H13\_Nav\_3 1239 -----HKEMNDNINESKEEST-----IVPATLNDESTLIAEVSNAAEIQVSDQ-  
 H1\_Nav\_4 1342 RFRKRKSKVEDSQLTLESDTISTQKSNKGDLKVENINYMRRTLGRKSKKGSLEIENARSKDAFVLIETAK EDEGDEGRQTANNLSHSD  
 H2\_Nav\_4 897 RFRKRKSKVEDSQLTLESDTISTQKSNKGDLKVENINYMRRTLGRKSKKGSLEIENARPKDAFVLIETAK EDEGDEGRQITANNLSRSD  
 H13\_Nav\_4 970 RKVKKHKRQKQGHNSKQQSEDMNQPEESAD-----KMINYRLRTIRGSFDPESLEAMDAFVLLERQDEGQADGNL IAEVNDVNKQN  
 H4\_Nav\_4 990 -----DLGNDNIAADIEIACQKDT-----EPTNATEPIAYNYAINDQKGLQKPVTT E FV  
 H1\_Nav\_5 1061 -----INSSTAGDLHDQNESDQDDLM-----ANVAKFRTRTLKKTASDFPGTEASQDDVYLVESVDEKRNISNYFHKNTFNSSSL  
 H2\_Nav\_5 1030 -----INSSTAGDLHDQNESDQDDQM-----ANVAKFRTRTLKKTASDFPGTEASQDDVYLVESVDEKRNISNYFHKNTFNSSSL  
 H4\_Nav\_6 976 -----NLPEESNIHNTLLKQR-----AERVDVVIIRGSNGSNIADIQKQSNYAQKI  
 H13\_Nav\_6 976 -----NLPEETNIHNTLLKQR-----AERVDVVIIRGSNGSNIADIQKQSNYAQKI  
 H13\_Nav\_7 1092 EQIGFAAKK-SHRPGGLNEYNDHNLQKQ-----YSSRKL SLLDNDLTATLASRD AIIIEEATNQNVFQDKDCKND CNHIS  
 H4\_Nav\_7 1019 EQVGSAAKK-SHRHGGSIDNNDYNFLQKR-----YSSRKL SLLDNDRTATLASRD AIIIEEATNQNVFQDKDCKNDW NHIS  
 H4\_Nav7 1119 EQVGFAAKN-SHRHGGLNDNNDLNLQKQ-----YRSRKL SLLDNDLSATLASRD AIIIEEATDDNQVTDKDKDCKND CNHIS  
 H13\_Nav\_7 946 EQIGFAAKK-SHRPGGLNEYNDHNLQKQ-----YSSRKL SLLDNDLTATLASRD AIIIEEATNQNVFQDKDCKND CNHIS  
  
 H1\_Nav1 1260 S-----GSGTLTCHVGTGMASSENL DNGISNPKTSLMSKSVTQ  
 H2\_Nav\_1 497 S-----GSGTLTCHVGTGIASSENL DNGISNPKTSLMSKSVTQ  
 H4\_Nav\_1 1174 -----LSLHNP NPKSGSENLP SGHSRTSSNAKLVHASKST  
 H13\_Nav1 1155 -----LSLHNP NPKSGSENLP TGHSTRSSNAKLVHASKST  
 H1\_Nav\_2 987 -----QEKKQ RSLNQTEEDSDYLDLQRTLGLLVPDQ-  
 H2\_Nav\_2 987 -----QEKKQ RSLNQTEEDSDYLDLQRTLGLLVPDQ-  
 H4\_Nav\_2 1026 -----REYKORSSIQSQEEDSDYLELVKAFKLSRFEQAS-  
 H13\_Nav\_2 1026 -----REYKORSSLSQEQEEDSDYLELVKAFKLSRFEQAS-  
 H1\_Nav\_3 1190 TFHG-----QDNGNPNNEKATNPISNNLNTAGEFPLTNRCNNS EID  
 H2\_Nav\_3 1148 TFHK-----QDNGNPNNEKATNPISNNLNTAGEFPLTNRCNNS EID  
 H4\_Nav\_3 1236 -----PAKSDQNHLDKNC KSNPTFTNDEESPTDQSDVIQAV  
 H13\_Nav\_3 1283 -----PAKFDQNHLDKNC KSNPTFTNDEESPTDQSDVIQAV  
 H1\_Nav\_4 1432 PLDNRNLVNANKMETLQQPRASIEAKQVVRSSIAMYDEKGN T-----QVDTSVNGRQEESTQIDYLTTEROKRNIQMDQLADKR  
 H2\_Nav\_4 987 PLDDRNLVNANKMETLQQPRASIEAKQVVRSSIAIYDGGKNT-----QVDTSVNGRQEESTQIDYLTTERH KRNIQMDQLADKR  
 H13\_Nav\_4 1050 KSTSQLTTDN RNSCRNNA AITS-----SQEAILANTAEQLGDSSPHNTLRNKPEEDNDKNVINE  
 H4\_Nav\_4 1040 K-----PRRKIFGRRTAAVLNHNFTNEKSNKPKKEQRKFRKN



H1\_Nav\_5 1137 RGDKT-----YNTSSESYHLPSSDIPSPVIVEDTTEDDGTNKQKIIIE  
H2\_Nav\_5 1106 RGGKT-----YNTSSESSHLPSSDIPSPVIVEDTTEDDGTNKQKIIIE  
H4\_Nav\_6 1024 EKNNVLHVKDVPLSDT-----TQQPIKRGLFRGRKKKSNAMHKRASGGAILHKRQVPD  
H13\_Nav\_6 1024 EKNNVLHIKDVPLSDT-----TQQPIKRGLFRGRKKKSNAMLKRASGGAILHKRQVPD  
H13\_Nav\_7 1169 VKQQDAI--ASKLSDPNLPVAILDPMTIKKDIVQDDEVNSKTVSTPQNFYSATDSNKTLNHNDVSNRHNVLKERNASGGSNVEDNAVVE  
H4\_Nav\_7 1096 FKQQDAI--ASKLSDPNLPVATLDPVTVKKDIVQDDEVNSKSVSTHQNFYSATDSNNTLNHNDVSNRHNVLERNASGGSNVEDNAVVE  
H4\_Nav7 1196 VKQQD--VAASKLSDPNLPVTTLDPATIKKDIMQDNEANSETLSTPQNYSTTDSNNTLNHNDVIRNRLNLIKDRNASKCSNVEDNAMVE  
H13\_Nav\_7 1023 VKQQDAITAD-----RMVYLRRRDNDVSNRHNVLKERNASGGSNVEDNAVVE

H1\_Nav1 1297 -----LESKNETRLIIDRRR--STRS-----VNRNH---SHLSE-----DDDDYYYPEQ-----DSDESD  
H2\_Nav\_1 534 -----LESKNETRLIIDRRR--STRS-----VNRNHSHLSE-----DDDDYYYPEQ-----DSDESD  
H4\_Nav\_1 1212 TQ-----LDKEGQSRLIIDRRR--STRS-----VNRNV---GHQSD-----DDDYHYPEDVSDR--SSDDSD  
H13\_Nav1 1193 TQ-----LDKEGQSRLIIDRRR--STRS-----VNRNV---GHQSD-----DDDYHYPEDVSDR--SSDDSD  
H1\_Nav\_2 1019 -----IDDES DSGQIIDKRNYSVRR-----ASSRR-----KSMQTSTSSIFDSNSRDVSS  
H2\_Nav\_2 1019 -----IDDES DSGQIIDKRNYSVRR-----ASSRR-----KSMQTSTSSIFDSNSRDVSS  
H4\_Nav\_2 1060 -----IDDEANANPINDKRNFLSVRR-----ASTRR-----RSLNRSTSSLFDSNSRDVSN  
H13\_Nav\_2 1060 -----IDDEANANPINDKRNFLSVRR-----ASTRR-----RSLNRSTSSLFDSNSRDVSN  
H1\_Nav\_3 1231 IGDPLSSTFHATTHDNPLKLLDEQSSVINQH-----QYCNQ---AGNNN-----RSESHLPPSILKQFDADISE  
H2\_Nav\_3 1189 IGDPLSSTFHATTHDNPLKLLDEQSSVINQH-----QHCNR---AGNNN-----RSESHLPPSILKQFDADISE  
H4\_Nav\_3 1274 IHHSANSSIDICFRDNL ELADETKGQANHY-----QNCNGDAVRS DNNAQ-----QEMYLDTNGIAEDSLKQYKN  
H13\_Nav\_3 1321 IHHSATSSIDICIRDNLQLADETKGQANHY-----QNCNGDAFRSDNNA-----QEMHLDTNGIAEDSLKEYKN  
H1\_Nav\_4 1511 YKQNAQMDQ-VDDGRK VQSIIVSVTSPNLQATTLEYKLRNRVWSNSMPPIDSKSGLPNS EKNRTEVSTQTEDLDNSEENDSNSTKMF EKN  
H2\_Nav\_4 1066 YKQNAQMDH-VDDGRK VQSIIVSVTSPNLRQTITQ EYKLRNRVWSNSMPPIDSKSGLPNS EKNRTEVSTQTEDLDNSEENDSNSTKMF EKN  
H13\_Nav\_4 1109 SQRQSFIIISVTD PDAKQTQIDKYIYIKSKSNGVNR SQSM-----SVENNKVEVSKSGNRNSVGEQDDSTSTLGNSSNNFTVYEE  
H4\_Nav\_4 1078 QKLKGRSN--IQQSED TNQQAESAENMIHYR-----LRTIRGSFNQGSADTADAFVLLERQDDSQADGNLVTDS  
H1\_Nav\_5 1179 SQDFGALAN-IDDVTKDVILSPRE RNNATNLKIFNG-----ITREDYIHF RKDSNTMQIPATDINDQERKLSVSSTNFDRR  
H2\_Nav\_5 1148 SQDFGALAN-IDDVTKDVILSPRE RNNATNLKIFNG-----ITREDYIHF RKDSNTMQIPATDINDQERKLSVSSTNFDRR  
H4\_Nav\_6 1077 INEQYEINKGKIFNESQLTALETSSLNDFVIIGSID-----QNGMIDGNSCSNHGKDDH SKVDMISKHGNNSNINFASSSH  
H13\_Nav\_6 1077 INEQYEINKGKIFNESQLTALETSSLNDFVIIGSID-----QNGMIDGNSCSNQGKDDH SKVDMISKYGNNSNINFASSSH  
H13\_Nav\_7 1257 VHQSSNNTG-VNTLKKKSMDEQVSDSIGDHGHTQDL-----QDLNDGKCDLKRSSQTSATAEDNHATQKSNKQIVTGVD  
H4\_Nav\_7 1184 VHQSSNNTGVNTLEKKKSMDEQVSDSIGDHGHTQDL-----QDLNDGKCDLKRSSQTSATAEDNHATQKSNKQIVTGVD  
H4\_Nav7 1284 VHQSSNNTG-VKTLSEKSTDAKVSNNIDDDHYTQDL-----QDLKDEKRDPRRSSQTSATTQDYHHVAQKTSKQIIADLD  
H13\_Nav\_7 1070 VHQSSNNTG-VNTLKKKSMDEQVSDSIGDHGHTQDL-----QDLNDGKCDLKRSSQTSATAEDNHATQKSNKQIVTGVD

H1\_Nav1 1343 DEVIISDDKPSRVATPPLR---RGQVSRSSFVRLGSD-----GD  
H2\_Nav\_1 580 DEVIISDDKPSRVATPPLR---RGQVSRSSFVRLGSD-----GD  
H4\_Nav\_1 1262 DEVIVADNDHHSRVATPPLR---RGQVSRASLRRPGPD-----GD  
H13\_Nav1 1243 DEVIVADNDHHSRVATPPLR---RGQVSRSSLRRPGPD-----GD  
H1\_Nav\_2 1066 DYIY-----CETPNVS---RQDSARSDSQC TDTE-----AN  
H2\_Nav\_2 1066 DYIY-----CETPNVS---RQDSARSDSQC TDTE-----AN  
H4\_Nav\_2 1107 DSLF-----YATPTIS---RQGSGRSESMWT-----TS  
H13\_Nav\_2 1107 DSLF-----YATSTIS---RQGSGRSESKWT-----TS  
H1\_Nav\_3 1292 RNTNLPEDNAAASN-----HQSSNDRNCSVIHTN-----GI  
H2\_Nav\_3 1250 RNTNLPEDNAAASN-----HQSSNDRNCSVIHTN-----GI  
H4\_Nav\_3 1339 NGLTVPVAVKQQLSTEI-----KHSSLPVSIT-----NE  
H13\_Nav\_3 1386 NGLTVPVAVKQQLSTEI-----KHSSLPVSIT-----NE  
H1\_Nav\_4 1600 QYLTVGMDARGSRNNLPNSE---SRARLRGSTSPPGNI-----AT  
H2\_Nav\_4 1155 QYLTVGTDARGSRNNLPNSE---SRARLRGSTSPPGNI-----AT  
H13\_Nav\_4 1188 SRQKTQFVNSEEEELGINKVYLHDDENS LNTLQISKPKSP-----LR  
H4\_Nav\_4 1147 IHQLNKSQSQVVKAVL-----DNAVMKQLADSPHT-----TS  
H1\_Nav\_5 1254 RHVYQRDPGRE TQASIGTLSERIEAKLEDGVDGKSGTK-----KI  
H2\_Nav\_5 1223 RHVYRRDPGRE TQASIGTLS-----ERIEAK-----LE  
H4\_Nav\_6 1153 DHRLQE QVNHNLNQSSNPVIM---DRHSSHSMIANGHD-----DL  
H13\_Nav\_6 1153 DHRLQE QVNHNLNQSSNPVIM---DRHPNHSMIANGHDDLKSGNANIINASNAISDLDKVKCHNVLPQVQV EDIE SNSVPSNSSIDSGK  
H13\_Nav\_7 1333 SYSVNESDE---TDLVSIR---NQARSRSNTLRTART-----TS  
H4\_Nav\_7 1261 SYSVNESDE---SDLVSIR---NQARSRSNTLRTART-----TS  
H4\_Nav7 1360 SIPVNEIDE---TDLASIR---NKARSRSNTLRTART-----TS  
H13\_Nav\_7 1146 SYSVNESDE---TDLVSIR---NQARSRSNTLRTART-----TS

H1\_Nav1 1380 IDANEDEDWSAS-----RCESTVGDAEEAATTNLPAPCFPRFVSKC-FPACRSD EWAITNYWVTMRIYVKRLVEHRVFE  
H2\_Nav\_1 617 IDANEDEDWSAS-----RCESTVGDAEEAATTNLPAPCFPRFVSKC-FPACRSD EWAITNYWVTMRIYVKRLVEHRVFE  
H4\_Nav\_1 1299 FDYND EEHWSES-----RCQSEIDEAEQSATNTVLPAPCFPAFITDR-FPNCHSENWIITDYWVLMRMYIKRLVEHRVFE  
H13\_Nav1 1280 FDYND EEHWSES-----RCQSEIDEAEQSATNTVLPAPCFPAFITDR-FPNCHSENWIITDYWVLMRMYIKRLVEHRVFE  
H1\_Nav\_2 1094 NSVGMKAMSNTS-----CNGGLQYSERSISQPIDCFPKVCMKR-IPYCIQGETSLCQAWMTVRNHVKNVVEHRFFE  
H2\_Nav\_2 1094 NSVGMKAMSNTS-----CNGGLQYSERSISQPIDCFPKVCMKR-IPYCIQGETSLCQAWMTVRSHVKNVVEHRFFE  
H4\_Nav\_2 1129 -DFGNEANGKPL-----SNGAQCSQEVTSPPSDCFPKACMKY-APCCMHDEGTL CNVWKKVRYRVKNVVEHRIFE  
H13\_Nav\_2 1129 -DFGNEANGKPL-----SNGAQYSQEVTSPPSDCFPKACMKY-APCCMQDEGTL CNVWKKVRYRVKNVVEHRIFE  
H1\_Nav\_3 1323 DNFTARDGNSYNT-----SSDDIFGKKGDISVSHCLPDCIGEK-FSKCIKVDSSSYQAWIAARKMIQKWMTHWVYN  
H2\_Nav\_3 1281 NNFTARDGNSYNT-----SSDDIFGKKGDISVSHCLPDCIGEK-FSKCIKVDSSSYQAWIAARKMIQKWMTHWVYN  
H4\_Nav\_3 1367 ATINENAHSSVT-----VPSRRSSVCSDRDVI ELSNCLPEVVG DQ-FFKCIKVSSPSYQAWISVRRMVHSWITSRYYN  
H13\_Nav\_3 1414 ATINENAHSSVT-----VPSRRSSVCSDRDVI ELSNCLPEVVG DQ-FFKCIKVSSPSYQAWISVRRMVHSWITSRYYN

H1\_Nav\_4 1637 IGKEYDRSSRNSYGGPPVRLIVILTNLAVKGDNKKLLALFSTEREVPYYFPCFLRDA-FHCQITYDWRLVRAITYIRRKALLVLDNITH  
H2\_Nav\_4 1192 IGKEYDRSSRNS-----YGGPGKDNKKLLALFSTEREVPYYFPCFLRDA-FHCQITYDWRLVRAITYIRRKALLVLDNITH  
H13\_Nav\_4 1229 TDDSTKSNWKSRRANSK-----MDEEYNNKKEKRLALFNATAEIPYYFPLIRWI-CHCHADHWTLVKAVTYLRRKSVLVEESCYFR  
H4\_Nav\_4 1180 SSILQENNGKHL-----VNGSHRQSFITVTDPDANQTKIDKYLYIKNKSDDAKRSESSISSATGKVDVIEKGNKEN  
H1\_Nav\_5 1295 YVLLNCHHQYII-----NSIQNFQRALTFLFGSENTVPAFFPSFLTNF-CHCQVTYDWKLVRLITYIRKKLLLVLENRWYK  
H2\_Nav\_5 1251 DGVGDKKSGYTK-----KNFQRALTFLFGSENTVPAFFPSFLTNF-CHCQVTYDWKLVRLITYIRKKLLLVLENRWYK  
H4\_Nav\_6 1190 KSGNANIINASN-----AISDLIDVVKCHSVLVPVQEDIESNSVPS--NSSIDSEKAQQENTEHEKSKKLLTVKMLSAN  
H13\_Nav\_6 1239 AQQENTEHEKSK-----KKLTKNLQSAKFLGLTETIQVPPFFPNVISNL-FHCQVTYNWRILIKILTIRKKILIIENRWYQ  
H13\_Nav\_7 1366 ALTTDRRKSPDK-----LKEFQHALEFLFGSEVYVPPFFPSIVTNS-CHCQATYDWRIVRLITEIRRKLIYFTENRWYQ  
H4\_Nav\_7 1294 ALTTDRRKSPDK-----VKKFQHALEFLFGSEVYVPPFFPSIVTNS-CHCQATYDWRIVRLITEIRRKLIYFTENRWYQ  
H4\_Nav7 1393 ALIAADRRHKSPD-----KLKKLQHALEFLFGSEVYVPPFFPSIVTNS-CHCQATYDWRIVRLITEIRRKLIYFTENRWYR  
H13\_Nav\_7 1179 ALTTDRRKSPDK-----LKEFQHALEFLFGSEVYVPPFFPSIVTNS-----WPLPSYL-----RLENSSTYH

H1\_Nav1 1454 GIILLILIFASSVILA-LEDAYIL--QRQDLARATEALNVFFAIAFTVEMVLKWIIGLGFVAYFTNPWNLLDASIVAISLVTIILRNLAADR  
H2\_Nav\_1 691 GIILLILIFASSVILA-LEDAYIL--QRQDLARATEALNVFFAIAFTVEMVLKWIIGLGFVAYFTNPWNLLDASIVAISLVTIILRNLAADR  
H4\_Nav\_1 1373 AIILILIFASSIILA-LEDVYIL--QRQDLARVTEALNIFFAVAFTIEMVLKWIIGLGFVAYFTNPWNLLDASIVAISLMTIILSNLAADR  
H13\_Nav1 1354 AIILILIFASSIILA-LEDVYIL--QRQDLARVTEALNIFFAVAFTIEMVLKWIIGLGFVAYFTNPWNLLDASIVAISLMTIILSNLAADR  
H1\_Nav\_2 1164 GIILLILIVASSISLV-----LYVSNIFFAAASFIEMLIKLIGIGVHGYSICSPWNILDAIVVVSIIITLVLENVSAFR  
H2\_Nav\_2 1164 GIILLILIVASSISLV-----LYVSNIFFAAASFIEMLIKLIGIGVHGYSICSPWNILDAIVVVSIIITLVLENVSAFR  
H4\_Nav\_2 1198 GIIFLIVASSITLT-FEDIHLH--NNPIMIQLVSVGNIFFAAASFIEMLIKLIGLGIYGYVSSPWNILDAIVVVSIIITLVLENVSAFR  
H13\_Nav\_2 1198 GIILLILIVASSITLT-FEDIHLH--NNPIMIQLVSVGNIFFAAASFIEMLIKLIGLGIYGYISSPWNILDAIVVVSIIITLVLENVSAFR  
H1\_Nav\_3 1392 LLMILLIMASSILLA-MEDKRAV--QNPPYWYNIRLAESIVTLFIVTIIIFEIFARGISQYFSNGWNVLDFTVIVITLTVNLLPRNIYLI  
H2\_Nav\_3 1350 LLMILLIMASSILLA-MEDKRAV--QNPPYWYNIRLAESIVTLFIVTIIIFEIFARGISQYFSNGWNVLDFTVIVITLTVNLLPRNIYLI  
H4\_Nav\_3 1439 ILMILITASSILLA-MEGRNAV--TNQAIWYRIRWGEAIVTMFTVTVLEMFACGISKYFTNGWNILDFSVILITLVNLLPRNVYLI  
H13\_Nav\_3 1486 ILMILITASSILLA-MEGRNAV--TNQAIWYRIRWGEAIVTMFTVTVLEMFACGISKYFTNGWNILDFSVILITLVNLLPRNVYLI  
H1\_Nav\_4 1726 KIILLIIMHVSLLV-FNDKTIQ--SNQNMKNIIFNMDYLLTIFFTVELALEFISFGPSTFCTSPWKIVDVIIIVALSFATYHLDLSASVS  
H2\_Nav\_4 1267 KIILLIIVMHSVLLI-FNDKTIQ--SNQNMKNIIFNMDYLLTIFFTVELALEFMSFGPSTFCTSPWKIVDVIIIVALSFATYHLDLSTSAR  
H13\_Nav\_4 1312 LFMLILIVGHSILLT-FNDKHMV--SSTAIWNATYLVDDYMSIFFAGELIVEIACFGPNGYFGSPWKVIDAIIIVTISLVSFLIDEQITLD  
H4\_Nav\_4 1251 EII-----YYNTNLIARERGNQPSINN-----NGEELVEFACFGPNGFFGGSWKVIDSVIVAV-----  
H1\_Nav\_5 1371 TFMLLLIIFHCVILRVINENGVNTISSPSAFSMLEIINSFFAGELIVSFFAHGCVNFCTSPWKMMDVIIIVGL--LFL-----  
H2\_Nav\_5 1323 TFMLLLIIFHCVILV-INENGVT-NTISPPSAFMLEIINSFFAGELIVSFFAHGCVNFCTSPWKMMDVIIIVGLSITTYFVDTKDRRI  
H4\_Nav\_6 1262 GNLFLLKSYVYSI--INDRNI--EKSHFQILMQIEFGMSLFFAGELLVAFIAYGIEENFCTSPWKIMDVILVGLSITTYFVDTKDRRI  
H13\_Nav\_6 1315 RLILLILIAHVSLLI-INDRNI--EKSHFQILMQIEFGMSLFFAGELLVAFIAYGIEENFCTSPWKIMDVILVGLSITTYFVDTKDRRI  
H13\_Nav\_7 1439 AFILLIIFHCFLV-INNRESTTEQNGQFQMTFLIEFIIDVFFIVELLVRIFAIGLVTFFTPSPWKILELIVLGLSITTYFYIDIISKLL  
H4\_Nav\_7 1367 AFILLIIFHCFLV-INNRESTTEQDKQFQMTFLIEFIVDVFVTELLVRIFAIGLVTFFTPSPWKILELIVLGLSITTYFYIDIISKLL  
H4\_Nav7 1467 AFILLIIFHSSLLV-INNRESTTEQARQFQETLDSVEFIINMFFSVLELLVRIFAIGLVTFFTPSPWKILELIVLGLSIATFYIDDSAKKL  
H13\_Nav\_7 1236 RNSQEINLFYRKSLLV-INNRESTTEQARQFQETLDSVEFIINMFFSIELLVRIFAIGLVTFFTPSPWKILELIVLGLSIATFYIDDSAKKL

H1\_Nav1 1541 S---LRTLALRPLRAVSHWEGMKVVVNALFGSIPSIANVILVGAIIWLFIFGSGMYIFGGFLFYKCE--DAAGNRMNASIIIPNRTVCLDNG  
H2\_Nav\_1 778 S---LRTLALRPLRAVSHWEGMKVVVNALFGSIPSIANVILVGAIIWLFIFGSGMYIFGGFLFYKCE--DAAGNRMNASIIIPNRTVCLDNG  
H4\_Nav\_1 1460 S---LRTLALRPLRAVSHWEGMKVVVNALFGSIPSIANVILVGAIIWLFIFGITGMYIFGGFLFYKCE--DSAGNRLNATIIPNRTVCLDNN  
H13\_Nav1 1441 S---LRTLALRPLRAVSHWEGMKVVVNALFGSIPSIANVILVGAIIWLFIFGITGMYIFGGFLFYKCE--DSAGNRLNATIIPNRTVCLDNN  
H1\_Nav\_2 1236 S---LRVLRALRPLRAISHWEGMRAVVNALFGCIPHITNVIIVCAFFWLVFVGGVNFVGGKFKYKCL-DLDNLLIPASIIISNKTDCCLANN  
H2\_Nav\_2 1236 S---LRVLRALRPLRAISHWEGMRAVVNALFGCIPHITNVIIVCAFFWLVFVGGVNFVGGKFKYKCL-DLDNLLIPASIIISNKTDCCLANN  
H4\_Nav\_2 1285 S---FRVLRALRPLRAISHWEGMRAVVNALFGCIPHIANVIIVCAFFWLVFVGVAVNFVGGKFKYKCV-DSSDQVLSTSIIVNKSQCLDKG  
H13\_Nav\_2 1285 S---FRVLRALRPLRAVSHWEGMRAVVNALFGCIPHIANVIIVCAFFWLVFVGVAVNFVGGKFKYKCV-DSSDQVLSTSIIVNKSQCLDKG  
H1\_Nav\_3 1478 ----ARTTKAIGPLRVIRRVQSIKMMFLAILESIPKIMNVFLVCMVFWYIFAVSGIYFFGGKFFRCIYVSNSSLVDSALVGDKDSCKGND  
H2\_Nav\_3 1436 ----ARTTKAIGPLRVIRRVQSIKMMFLAILESIPKIMNVFLVCMVFWYIFAVSGIYFFGGKFFRCIYVSNSSLVDSALVGDKDSCKGND  
H4\_Nav\_3 1525 ----ARTVKAIGPFRIRHVESLKTTFLSILDSIPKIMNVFLVCMVFWYIFAVSGIYFFGGKFFQCYKSNSSLVDFIVNNTKTECQGSN  
H13\_Nav\_3 1572 ----ARTVKAIGPFRIRHVESLKTTFLSILDSIPKIMNVFLVCMVFWYIFAVSGIYFFGGKFFQCYKSNSSLVDFIVNNTKTECQGSN  
H1\_Nav\_4 1813 QSLFENIINSIRPIRIIPRLGSLQVIVAALVLSIPSIVNVLVCSIFWLIFAITGVQLFAGTFGRCL--INVDNSTLANVTNKTECDNMG  
H2\_Nav\_4 1354 QSLFENIINSIRPIRIIPRLGSLQVIVAALVMSIPSIVNVLVCSIFWLIFAITGVQLFAGTFGRCL--INVDNSTLANVTNKTECDNMG  
H13\_Nav\_4 1399 Q---YNIINSLRPVRIIPRLKLNQIIVAALLMSIPSIIINFLVCSIFWVFAVAVTGVQVFAAGKFGRC--ASPTVSTLVNVTDKVECDKLG  
H4\_Nav\_4 1304 -----IVAALFLSIPSIIINFLVCSIFWVFAVAVTGVQVFAAGKFGRC--LSPNHQTLANVSNKIECDNMG  
H1\_Nav\_5 1452 -----QWKQLLIVM-----RCL-----  
H2\_Nav\_5 1410 ----YNIIVNSLRISIRIIPRMNQLQIIVAALLSIPSIFNVLVCSIFWLIFAITGVQVFAAGKFGRC--NSHLKSVTFNYITNRTDCLMYG  
H4\_Nav\_6 1347 ----YDLVNSIRPVRAIPRLKLNQIIVAALFSLPSILNVLVCSIFWLIFAITGVQVFAAGKFGRC--DKFSNNVVLAKITNKTDICISNG  
H13\_Nav\_6 1401 ----YDLVNSIRPVRAIPRLKLNQIIVAALFSLPSILNVLVCSIFWLIFAITGVQVFAAGKFGRC--DKFSNNVVLAKITNKTDICISNG  
H13\_Nav\_7 1527 ----YDVVNSIRPFRIIPRINSIQVAATAILISIPSIIINFLVCFLLFWLVFA-----FVVC-----KRW  
H4\_Nav\_7 1455 ----YVVVNSIRPFRIIPRINSIQVAATAILISIPSIIINFLVCFLLFWLVFAICGVQVFAAGTFGRCV--DASLEQISDYNITDKAQCLRDG  
H4\_Nav7 1555 ----YDVVNSIRPFRIIPRVNGIQIATAILMSIPSIIINFLVCFLLFWLVFAICGVQVFAAGTFGRCV--NANLEQISSNITDETCQCLRDG  
H13\_Nav\_7 1324 ----YDVVNSIRPFRIIPRVNGIQR-----W-----

DIII

H1\_Nav1 1626 -LTWQNSLINFDSVPAALFALFQVATFEGWMEIMRDATAK-----IDLQPVRLYNKG  
H2\_Nav\_1 863 -LTWQNSLINFDSVPAALFALFQVATFEGWMEIMRDATAK-----IDLQPVRLYNKG  
H4\_Nav\_1 1545 -YEWKNSLINFDSVPAALFALFQVATFEGWMEVMRDAVDARG-----PNLQPIRLYNKA  
H13\_Nav1 1526 -YEWKNSLINFDSVPAALFALFQVATFEGWMEVMRDAVDARG-----PNLQPIRLYNKA  
H1\_Nav\_2 1321 -YIWKNSQINFDSVPQAFALFEVATFEGWIQVMGDAVDARE-----IDQQPIPLNKS  
H2\_Nav\_2 1321 -YIWKNSQINFDSVPQAFALFEVATFEGWIQVMGDAVDARE-----IDQQPIPLNKS

H4\_Nav\_2 1370 -YVWQNSPINFDSVPQAF LALFEVATFEGWIIQIMGDAVDARE-----INQQPIPLYNKS  
H13\_Nav\_2 1370 -YVWQNSPINFDSVPQAF LALFEVATFEGWIIQIMGDAVDARE-----INQQPIPLYNKS  
H1\_Nav\_3 1564 -YKWTNSLIHFDDFPQAIILLFHVATFDGWKRALYNAVDARG-----INLQPVTYYNPA  
H2\_Nav\_3 1522 -YKWTNSLIHFDDFPQAIILLFHVATFDGWKRALYNAVDARG-----INLQPVTYYNPA  
H4\_Nav\_3 1612 IYEWKNAIVHFDFFPHAIILLFHVATFDGWKRTLLNAVNARQ-----INLQPVALHNQW  
H13\_Nav\_3 1659 IYEWKNAIVHFDFFPHAIILLFHVATFDGWKRTLLNAVNARQ-----INLQPVALHNQW  
H1\_Nav\_4 1900 -YYWRNPVMNFDNLGNALISLFHIATLDGWKRLMKSAVDARG-----KDLQPKSLNLP  
H2\_Nav\_4 1441 -YYWRNPVMNFDNLGNALISLFHIATLDGWKRLMKSAVDARG-----KDLQPKSLNLP  
H13\_Nav\_4 1483 -YYWRKRDINFNLGNALLSLFHVATLDGWKRAMKSAVDARG-----VNLQPSNLHNPA  
H4\_Nav\_4 1367 -YYWRNRVINFDNLGNALLSLFHVATLDGWKRAMQSAVDARG-----VNLQPSNLHNPA  
H1\_Nav\_5 1464 -----  
H2\_Nav\_5 1495 -YLWEPY-----  
H4\_Nav\_6 1432 -YSWKPYDLNFDNLGNSLLSLLHIASMDGWKRLMKQAVDSRG-----IDLQPQILYNPA  
H13\_Nav\_6 1486 -YSWKPYDLNFDNLGNSLLSLLHIASMDGWKRLMKQAVDSRG-----IDLQPQILYNPA  
H13\_Nav\_7 1582 -LPWRPYDTNFDNLGNALLLHFIATLDGWTKIMRHTVEARG-----VGLVPKPLFNTA  
H4\_Nav\_7 1540 -YLWRPYDTNFDNLGNALLLHFIATLDGWTKIMRHTVEARGVGLVPKPLFNTAARIFVVCIFVIGVFISLNLIAGVIVGLVPKPLFNTA  
H4\_Nav7 1640 -YLWRPYDTNFDNLGNALLLHFIATLDGWTKIMRHTVEARG-----VGVVPKPLFNTA  
H13\_Nav\_7 1346 -LPWRPYDTNFDNLGNALLLHFIATLDGWTKIMRHTVEARG-----VGVVPKPLFNTA

**Inactivation gate**

H1\_Nav1 1680 AYVYFVIFIFFGTFFTLNLIVSVIIDNFYKLR-----TYERNAAGIPTDILLTESQKKWYKTMQKLSKKKPTKQIPPS  
H2\_Nav\_1 917 AYVYFVIFIFFGTFFTLNLIVSVIIDNFYKLR-----TYERNAAGIPTDILLTESQKKWYKTMQKLSKKKPTKQIPPS  
H4\_Nav\_1 1599 AYLYFVIFIFFGTFFTLNLIVSVIIDNFYKLR-----TYERNAAGIPTDILLTESQKKWYKTMQKLSKKKPTKQIPPS  
H13\_Nav1 1580 AYLYFVIFIFFGTFFTLNLIVSVIIDNFYKLR-----TYERNAAGIPTDILLTESQKKWYKTMQKLSKKKPTKQIPPS  
H1\_Nav\_2 1375 AYIYFVAFIIIGSFSLNLIVSVIIDCFYALKQ-----KESGSLGIPTDFMTEQKRWYNVMKTMSKSKPVRRIPLP  
H2\_Nav\_2 1375 AYIYFVAFIIIGSFSLNLIVSVIIDCFYALKQ-----KESGSLGIPTDFMTEQKRWYNVMKTMSKSKPVRRIPLP  
H4\_Nav\_2 1424 AYIYFVAFIIVGSFSLNLIISVVIDSFYTLKR-----KSENGSLGIPVEIFLTESQKRWYNVMKTMSKSRPVKRIPPP  
H13\_Nav\_2 1424 AYIYFVAFIIVGSFSLNLIISVVIDSFYTLKR-----KSENGSLGIPVEIFLTESQKRWYNVMKTMSKSRPVKRIPPP  
H1\_Nav\_3 1618 AHGYFVAFIIIGVFVALNLIVGVIIIDGFYVSHQ-----KLERQSGSALAEAYLTDQRWYRMMRKLKTKPKKSIPRG  
H2\_Nav\_3 1576 AHGYFVAFIIIGVFVALNLIVGVIIIDGFYVSHQ-----KLERQSGSALAEAYLTDQRWYRMMRKLKTKPKKSIPRG  
H4\_Nav\_3 1666 ANAYFVAFIIIGVFVALNLIVGVIEGFYVSHK-----QRQHGNALEAFLESQRRWYRMMRKLKTKPKKSIPPA  
H13\_Nav\_3 1713 ANAYFVAFIIIGVFVALNLIVGVIEGFYVSHK-----QRQHGNALEAFLESQRRWYRMMRKLKTKPKKSIPPA  
H1\_Nav\_4 1954 ARLFFIAFIVGVFVFLTLNLIAGVVIDQFYSSRK-----KSRISYEVKALALNQT-----KPKSLNQLCP-  
H2\_Nav\_4 1495 ARLFFIAFIVGVFVFLTLNLIAGVVIDQFYSSRK-----KINPVCQI-  
H13\_Nav\_4 1537 ARLYFVAFIATGVFVFLTLNLIAGVVIDQFYSSRK-----KYMSKRNSNSIEALFTDQHWYRMMRKLMRKLIIRVPPP  
H4\_Nav\_4 1408 -----  
H1\_Nav\_5 1464 -----  
H2\_Nav\_5 1501 -----  
H4\_Nav\_6 1486 ARLYFVAFIIIGVFITLNLIVGVIIIDRFYSSRK-----KYESRD-GSNISLFTDSQIHWYKMIKRLMRSKLIKSVPA  
H13\_Nav\_6 1540 ARLYFVAFIIIGVFITLNLIVGVIIIDRFYSSRK-----KYESRD-GSNISLFTDSQIHWYKMIKRLMRSKLIKSVPA  
H13\_Nav\_7 1636 ARIFVVCIFIVIGVFISLNLIAGVVIDRFYNSRK-----KYESSK-GKNIESLLTESQIRWYKMMKLMRVKLVKSIPPA  
H4\_Nav\_7 1630 ARIFVVCIFIVIGVFISLNLIAGVVIDRFYNSRK-----KYESSE-GKNIESLLTESQIRWYKMMKLMRVKLVKSIPPA  
H4\_Nav7 1694 ARIFMVCIFIVGVFISLNLIAGVVIDRFYNSRKGLLHPFSYSWDAKKYKYESK-GKNLESLLTESQIRWYRMMKLMRIKLVKSIPPA  
H13\_Nav\_7 1400 ARIFMVCIFIVGVFISLNLIAGVVIDRFYNSRK-----KYESSK-GKNLESLLTESQIRWYRMMKLMRVKLVKSIPPA

H1\_Nav1 1754 RYKQWQHLLGYVQTRFDLFIIMTIIFANTITMMVNHYQEAKESWLFYIFARQTRIIDI-----IFTSIYTLAAILKILAMR  
H2\_Nav\_1 991 RYKQWQHLLGYVQTRFDLFIIMTIIFANTITMMVNHYQEAKESWLFYIFARQTRIIDI-----IFTSIYTLAAILKILAMR  
H4\_Nav\_1 1673 KYQWQNDLLGYVQTRFELFIMVIFANTITMMVNHYQESKQ-----VTDALHILL-----ILLSAKAILKITAMR  
H13\_Nav1 1654 KYQWQNDLLGYVQTRFELFIMVIFANTITMMVNHYQESKQ-----VTDALHILL-----ILLSAKAILKITAMR  
H1\_Nav\_2 1449 KRDSQKRLLAIVQSNKFE LAIILVIVANTAAMMVVHFDQSQE-----VTRVLDILFL-----MR  
H2\_Nav\_2 1449 KRDSQKRLLAIVQSNKFE LAIILVIVANTAAMMVVHFDQSQE-----VTRVLDILFFTSKSYNEILVQVFGFILTIIYVLEAILKIIAMR  
H4\_Nav\_2 1498 KRDSQRLLAIVQSNKFEVTIIIVILINTIAMMMVHFDQSKD-----  
H13\_Nav\_2 1498 KRDSQRLLAIVQSNKFEVTIIIVILINTIAMMMVHFDQSKD-----  
H1\_Nav\_3 1692 NHQWQIRLRKFVENPKFEMTVIYIIVANVIVMMVTHYHESNE-----VHETALFFNG-----YLLGFNYFFTIFYVIEAVLKIIIVFR  
H2\_Nav\_3 1650 NHQWQIRLRKFVENPKFEMTVIYIIVANVIVMMVTHYHESNE-----VHETALFFNG-----YLLGFNYFFTIFYVIEAVLKIIIVFR  
H4\_Nav\_3 1738 TVRF-----IFKNSIMTK-----  
H13\_Nav\_3 1785 TSEWQNQLRKLVQDSRFEMLVIYIIVSNIVMMVTHYHESDE-----  
H1\_Nav\_4 2014 -----  
H2\_Nav\_4 1535 -----YQLGELIALLQLVI-----  
H13\_Nav\_4 1611 EYKWKQILIRIFEDKKYEIFSITVIILNVIAMAITHYKQS-----  
H4\_Nav\_4 1408 -----  
H1\_Nav\_5 1464 -----  
H2\_Nav\_5 1501 -----  
H4\_Nav\_6 1559 RTAWQNLMKFFEDKRYEIFNMVILLNVIVMTVTHYQSQNQ-----LTFILSILNY-----CFTAYYTLKILKLMAYR  
H13\_Nav\_6 1613 RTAWQNLMKFFEDKRYEIFNMVILLNVIVMTVTHYQSQNQ-----LTFILNILNY-----CFTAYYTLKILKLMAYR  
H13\_Nav\_7 1709 MFGWQNKLIKFFEDRRYEFANMAVFLNIIAMTATHYQSSAQ-----ITLILNIMNY-----SFTAYFGLKILKLLAFR  
H4\_Nav\_7 1703 MFGWQNKLIKFFEDRRYEFANMAVFLNIIAMTATHYQSSAQ-----ITLILNIMNY-----SFTAYFGLKILKLLAFR  
H4\_Nav7 1783 MFGWQNKLIKFFEDRRYEFANMAVFLNIIAMTATHYQSSAQ-----ITLIL-----TYFGLKILKLLAFR  
H13\_Nav\_7 1473 MFGWQNKLIKFFEDRRYEFANMAVFLNIIAMTATHYQSSAQ-----ITLILNIMNY-----SFTAYFGLKILKLLAFR

H1\_Nav1 1830 RYFFNIPWNVDFCIVILSIIGLVLDIIAQTN-----SIPISPSVLRVLRVFRITRVLRLIEVAKGVRRLMSLAMS L PALLNIGCLLF  
H2\_Nav\_1 1061 RYFFNIPWNVDFCIVILSIIGLVLDIIAQTN-----SIPISPSVLRVLRVFRITRVLRLIEVAKGVRRLMSLAMS L PALLNIGCLLF  
H4\_Nav\_1 1740 QYFFKIPWNVDFCIVILSIVGLVLDIIAQTN-----SIPISPSVLRILRVFRITRVLRLIEVAKGVRRLMSLAMS L PALLNIGCLLF  
H13\_Nav1 1721 QYFFKIPWNVDFCIVILSIVGLVLDIIAQTN-----SIPISPSVLRILRVFRITRVLRLIEVAKGVRRLMSLAMS L PALLNIGCLLF  
H1\_Nav\_2 1503 QHYFKNLWNLFDFIIVLVAIIGIILDVMDSSNA-----SIPINPSMLRTLRLFRIVRILRVLEFAKGIRKLLTAFAMSPALFNVALLVF  
H2\_Nav\_2 1533 QHYFKNLWNLFDFIIVLVAIIGIILDVMDSSNA-----SIPINPSMLRTLRLFRIVRILRVLEFAKGIRKLLTAFAMSPALFNVALLVF  
H4\_Nav\_2 1539 -----ITRLLDILDN-----  
H13\_Nav\_2 1539 -----ITRLLDILDN-----  
H1\_Nav\_3 1769 LYYFKDAWNLFDFAVVILSISGLVFEILTRANIISTTANTTINPSTIRILRIFRIVRILRLVQYAQGI RRLLSLAMSAPALLNIGMLTF  
H2\_Nav\_3 1727 LYYFKDAWNLFDFAVVILSISGLVFEILTRANIISTTANTTINPSTIRILRIFRIVRILRLVQYAQGI RRLLSLAMSAPALLNIGMLTF  
H4\_Nav\_3 1750 -----  
H13\_Nav\_3 1826 -----VGLV LNIFF-----  
H1\_Nav\_4 2014 -----L FLLLASITGIVLSNLASV-----TFRVSPAIRAIRIFRIVRIRLLRHAQGM RRLLMALIASIPALFNIAILIA  
H2\_Nav\_4 1549 -----SPLASITGIVLSNLPSV-----TFRVSPAIRAIRIFRIVRIRLLRHAQGM RRLLMALIASIPALFNIAILIA  
H13\_Nav\_4 1650 -----AVMTVALNILSMN-----  
H4\_Nav\_4 1408 -----  
H1\_Nav\_5 1464 -----  
H2\_Nav\_5 1501 -----  
H4\_Nav\_6 1629 LYFFKDIWNVDFM VVVIASLGGIILSLLPAL-----TFRISP AIVRILRVFRVVRILRLLRHARGM RRLMSLIASAPALFNIAALIA  
H13\_Nav\_6 1683 LYFFKDIWNVDFIVVVIASLGGIILSLLPAL-----KFRISP AIVRILRVFRVVRILRLLRHARGM RRLMSLITASAPALFNIAALIA  
H13\_Nav\_7 1779 LYFFKDIWNVDFLIVVLASVGLIFSL LPSI-----NFPVSPSIIIRIVRIVRILRLLRHARGM RRLMSLIVASIPALLNIAALLA  
H4\_Nav\_7 1773 LYFFKDIWNVDFLIVVLASVGLIFSL LPSV-----NFPVSPSIIIRIVRIVRILRLLRHARGM RRLMSLIVASIPALLNIAALLT  
H4\_Nav7 1845 IYFFKDIWNVDFLIVVLASVGLIFSL LPSI-----KFPVSPSIIIRIVRIVRILRLLRHARGM RRLMSLIVASIPALLNIAALLV  
H13\_Nav\_7 1543 LYFFKDIWNVDFLIVVLASVGLIFSL LPSI-----NFPVSPSIIIRIVRIVRILRLLRHARGM RRLMSLIVASIPALLNIAALLA

**DIV**

H1\_Nav1 1914 LV MFIYAIIGMSLFGSMVHHGTITDTINFETFPNAMALLFR LMTAAGWNDVLDLSLMTDGPNCNASLT--NLAPTGTG NPGAAIPYMVTF  
H2\_Nav\_1 1145 LV MFIYAIIGMSLFGSMVHHGTITDTINFETFPNAMALLFR LMTAAGWNDVLDLSLMTDGPNCNASLT--NLAPTGTG NPGAAIPYMVTF  
H4\_Nav\_1 1824 LV MFIYAIIGMSLFGGMVHHGTITDTINFETFPNAMAVLFR LMTSAGWNDVLDLSLMTDGPNCNATLT--NISPTGTG NPGAAIPYMVTF  
H13\_Nav1 1805 LV MFIYAIIGMSLFGGMVHHGTITDTINFETFPNAMAVLFR LMTSAGWNDVLDLSLMTDGPNCNATLT--NISPTGTG NPGAAIPYMVTF  
H1\_Nav\_2 1588 LV MFIYAIIVGMSSFAVVKHQTAITK NMFETFPNGLLLL FRLSTSAGWNDVLDLDMVQPPDCNNSAT--AFSWNGDCG NPPVAITFLITY  
H2\_Nav\_2 1618 LV MFIYAIIVGMSSFAVVKHQTAITK NMFETFPNGLLLL FRLSTSAGWNDVLDLDMVQPPDCNNSAT--AFSWNGDCG NPPVAITFLITY  
H4\_Nav\_2 1549 -----  
H13\_Nav\_2 1549 -----  
H1\_Nav\_3 1859 LV IFIYAVLGM SVFYNVKHTGVLTNVFNFD DFFNSLIVL FQLMTAAGWTDVSSALSIE SPNCNSNDT--TISPF GNCGRSLSLLFTSSY  
H2\_Nav\_3 1817 LV IFIYAVLGM SVFFNVKHTGVLTNVFNFD DDFNLSLIVL FQLMTAAGWTDVSSALSIE SPNCNSNDT--TISPF GNCGRPLSLLFTSSY  
H4\_Nav\_3 1750 -----  
H13\_Nav\_3 1835 -----  
H1\_Nav\_4 2086 VVSFYAIIGMSVFSHVKYHG VITKSLNFE NFVTT SII L VQFST AAGWTFH H ALSIQPPKCTSASAIPTFVPTGNC GSPHLATIYIISY  
H2\_Nav\_4 1620 VVSFYAIIGMSVFNHVKYHG VITKSLNFE NFITTSIIL VQLST AAGWTFH H ALSIQPPKCTSASAVSTFVPTGNC GSPHLATIYIISY  
H13\_Nav\_4 1663 -----  
H4\_Nav\_4 1408 -----  
H1\_Nav\_5 1464 -----  
H2\_Nav\_5 1501 -----  
H4\_Nav\_6 1712 IISYIYAVFGI A VFRNVKYQSVISATLNFQSFVK SSILLIQISTGSGWTDILHELSIQPPKCKPAATNSTFFPSGNC GDHTIAMIYVVSY  
H13\_Nav\_6 1766 VISYIYAVFGMAVFRNVKYQSVISATLNFQSFV KSSILLIQISTGSGWTDILHELSIQPPKCKPAATNSTFFPSGNC GDHTIAMIYVVSY  
H13\_Nav\_7 1862 IISFTYTIIGIALFKDVKYQGIIDATLNFQSYFK ASMILFQLSTAGWTFH H K ALSVQPPKCEANIT--TIIPTGNC GSPVLATIYIITY  
H4\_Nav\_7 1856 IISFTYTIIGITL F KDVKYQGIIDATIN FQSYFK ASMILFQLSTAGWTFH H K ALSVQPPKCEANIT--TIIPTGNC GSPVLATIYIMITY  
H4\_Nav77 1928 IVSFMYAIIGMTL FKNVKYQGIIDATIN FHSFYKTSIILFQLSTAGWTFH H K ALSVQPPKCEANIT--TIIPTGNC GSPVLATIYIITY  
H13\_Nav\_77 1626 IISFTYTIIGIALFKDVKYQGIIDATLNFQSYFK ASMILFQLSTAGWTFH H K ALSVQPPKCEANIT--TIIPTGNC GSPVLATIYIITY

H1\_Nav1 2002 VFITFLVLVNMVVAIILN NYQE VVEDEEIG-IT TGDIDMYE LWSKYDPYATQFIDYHFLSQFVADLN PPLKIPQPNKYACVALN LPLYD  
H2\_Nav\_1 1233 VFITFLVLVNMVVAIILN NYQE VVEDEEIG-IT TGDIDMYE LWSKYDPYATQFIDYHFLSQFVADLN PPLKIPQPNKYACVALN LPLYD  
H4\_Nav\_1 1912 VFITFLVLVNMVVAIILN NYQE VVEDEEIG-IT TSDIDMYE LWSKYDPYATQFIDYHFLSPFVAELN PPLKIPQPNKYACVALN LPLYD  
H13\_Nav1 1893 VFITFLVLVNMVVAIILN NYQE VVEDEEIG-IT TSDIDMYE LWSKYDPYATQFIDYHFLSPFVAELN PPLKIPQPNKYACVALN LPLYD  
H1\_Nav\_2 1676 IFITTFVLINM VVAIILN NYQE VVEDEEIGSVITAEDINVFYE TWAKYDPEASQFISFRYLSPLVAELK PPLRIPQPNKYPLIALDLALYD  
H2\_Nav\_2 1706 IFITTFVLINM VVAIILN NYQE VVEDEEIGSVITAEDINVFYE TWAKYDPEASQFISFRYLSPLVAELK PPLRIPQPNKYPLIALDLALYD  
H4\_Nav\_2 1549 -----PNK-----  
H13\_Nav\_2 1549 -----PNK-----  
H1\_Nav\_3 1947 VYLTWLVL SNL FVAVILSNYQD VVDTEAGG-VTE M D I D I F Y E V W A K Y D T E A T Q F I D Y S S L S P L V A D I K P P L G V P Q P N R Y A C I A L D L P L Y R  
H2\_Nav\_3 1905 VYLTWLVL SNL FVAVILSNYQD VVDTEAGG-VTE M D I D I F Y E V W A K Y D T E A T Q F I D Y S S L S P L V A D I K P P L G V P Q P N R Y A C I A L D L P L Y R  
H4\_Nav\_3 1750 -----  
H13\_Nav\_3 1835 -----  
H1\_Nav\_4 2176 ILLT C Y S I R R R Y ----- Q C F F E T W A K Y D P E A T Q F I H Y E E L S L L L N E L P P P F G T P I P N I Y V C I S L N L P V Y Y  
H2\_Nav\_4 1710 ILLT W F V L I N L F V A V I L S N Y Q D C V D A D S A T - V S E E D I S T F F E T W A K Y D P E A T Q F I H Y E E L S L L L N E L P P P F G T P I P N I Y V C I S L N L P V Y Y  
H13\_Nav\_4 1663 -----  
H4\_Nav\_4 1408 -----  
H1\_Nav\_5 1464 -----  
H2\_Nav\_5 1501 -----  
H4\_Nav\_6 1802 LLLIWFILINL FIAVILN NYQD C V E S D S A V - V S E E D I Q S F Y E T W A K Y D P K A T Q F I H Y N K L S N L L N D L S P P F G S P I P N T Y V C I S L H L P L Y E

H13\_Nav\_6 1856 LLLIWFILINLFIIVILNNYQDCVDES SAV-VSEEDIQSFYETWAKYDPKATQFIHYNKLSNLLNDLPPFPFGSPIPNTYVCISLHLPLYE  
 H13\_Nav\_7 1950 LVVAWFILLNLFIAVILNNYQDCVDADSAS-ISDEKIQSFFEETWAKYDPRATQFIHYNMLSSLLNDLEEPFGSPIPNTYVCIRLNLPIYD  
 H4\_Nav\_7 1944 LIAAWFILLNLFIAVILNNYQDCVDADSAS-ISDENIQSFFEETWAKYDPEATQFIHYNMLSSLLNDLEEPFGSPIPNTYVCIRLNLPIYD  
 H4\_Nav7 2016 LVVAWFILLNLFIAVILNNYQDCVDADSAS-ISDENIQSFFEETWAKYDPKATQFIHYNMLSSLLNDLEKPPFGSPIPNTYVCIGLNLPIYD  
 H13\_Nav\_7 1714 LVVAWFILLNLFIAVILNNYQDCVDADSAS-ISDEKIQSFFEETWAKYDPRATQFIHYNMLSSLLNDLEEPFGSPIPNTYVCIRLNLPIYD  
  
 H1\_Nav1 2091 EDRLHCLDILEGLLFRVLGNPFEE-GTQAVEEFFILKRQMEKKFAEAFPNWR--ADSANRNARTTMQLSRENWAAKVIQRAYRQWKYRSDI  
 H2\_Nav\_1 1322 EDRLHCLDILEGLLFRVLGNPFEE-GTQAVEEFFILKRQMEKKFAEAFPNWR--ADSANRNARTTMQLSRENWAAKVIQRAYRQWKYRSDI  
 H4\_Nav\_1 2001 EDRLHCLDILEGLLFRVLGNPFEE-GTQAVEEFFALKRQMEKKFAEAFPNWR--ADTANRNARTTMQLSRENWAAATVIQRAYRQWKYQSDI  
 H13\_Nav1 1982 EDRLHCLDILEGLLFRVLGNPFEE-GTQAVEEFFALKRQMEKKFAEAFPNWR--ADTANRNARTTMQLSRENWAAATVIQRAYRQWKYQSDI  
 H1\_Nav\_2 1766 SRLVHCLDVLEALVERVIGQPNADAEAGDVVEE---IKRQIQKKFSETFPSSGIPKQYDKSKRLKQLAVQEIKAAAVIIQRAYRHYRLRKAC  
 H2\_Nav\_2 1796 SRLVHCLDVLEALVERVIGQPNADAEAGDVVEE---IKRQIQKKFSETFPSSGIPKQYDKSKRLKQLAVQEIKAAAVIIQRAYRHYRLRKAC  
 H4\_Nav\_2 1552 -----  
 H13\_Nav\_2 1552 -----  
 H1\_Nav\_3 2036 SNRLHCLDIIEALLFRIIGNPADS-DEELTAEFDILIRRIKKSFLKFFPSR---VPAHQINRISELEKANITAAIIVQRAYRQWKYRSDI  
 H2\_Nav\_3 1994 SNRLHCLDIIEALLFRIIGNPADS-DEELTAEFDILIRRIKKSFLKFFPSR---VPAHQINRISELEKANITAAIIVQRAYRQWKYRSDI  
 H4\_Nav\_3 1750 -----  
 H13\_Nav\_3 1835 -----  
 H1\_Nav\_4 2241 GGNIHCLDVIAALLSKLMEKVIDEISQEFKDEYEQLLEKIHGVFHTKFFPKW---SNKSGETVTSRVLSDEVEPVILLRSSFRRWKALTYK  
 H2\_Nav\_4 1799 GGNIHCLDVIAALLSKLMEKIIDEISQEFKDEYEQLLEKIHGVFHTKFFPKW---SNKSGETVTSRVLSDEVEPVILLRSSFRRWKALTYK  
 H13\_Nav\_4 1663 -----  
 H4\_Nav\_4 1408 -----  
 H1\_Nav\_5 1464 -----  
 H2\_Nav\_5 1501 -----  
 H4\_Nav\_6 1891 GNKIHCLDVIHALLNKLMVDVIGEISDEFQDEYNLLIETINKAFQSKYPKW---KPHSNAKRIPSEYYKLVQSNLLLLKSYFYHWWKQRTKE  
 H13\_Nav\_6 1945 GNKIHCLDVIHALLNKLMVDVIGEISDEFQDEYNLLMETINKAFQSKYPKW---KPHSNAKRIPSEYYKLVKSNLLLLKSYFHHWWKQRTKE  
 H13\_Nav\_7 2039 ETKIHCLDLIRALIDKMMHDIIGEISTEFQEEYDLMMEKIGDVFKTRFPKW--KSKHSQDKKSSQLFDDQAKSVLLLRASFQHWKQKTTK  
 H4\_Nav\_7 2033 E-----  
 H4\_Nav7 2105 ETKIHCLDLIRALIDKMMRDIIGEISTEFQEEYDLMMEKIGDVFKTRFPKW--KSEHGQEKSSKLFYDQAKSVLLLRASFQHWKQKTTK  
 H13\_Nav\_7 1803 ETKIHCLDLIRALIDKMMHDIIGEISTEFQEEYDLMMEKIGDVFKTRFPKW--KSKHSQDKKSSQLFDDQAKSVLLLR-----  
  
 H1\_Nav1 2179 HKATYRHVHSRRRH-----  
 H2\_Nav\_1 1410 HKATYRHVHSRRRH-----  
 H4\_Nav\_1 2089 HKANYQHVHSRRRH-----  
 H13\_Nav1 2070 HKANYQHVHSRRRH-----  
 H1\_Nav\_2 1853 KEHCQMRMRQSVIHLHQNLMKS-----  
 H2\_Nav\_2 1883 KEHCQMRMRQSVIHL-----  
 H4\_Nav\_2 1552 -----  
 H13\_Nav\_2 1552 -----  
 H1\_Nav\_3 2122 NDRVERHQLVYRNVANRCEKKPQKIGLKKIRNARNVNNA  
 H2\_Nav\_3 2080 NDRVERHQLVYRNVANRCEKKPQKIGLKKIRNARNVNNA  
 H4\_Nav\_3 1750 -----  
 H13\_Nav\_3 1835 -----  
 H1\_Nav\_4 2328 RRQGYDVNFWILIM-----  
 H2\_Nav\_4 1886 RRQGYDVNFWILFM-----  
 H13\_Nav\_4 1663 -----  
 H4\_Nav\_4 1408 -----  
 H1\_Nav\_5 1464 -----  
 H2\_Nav\_5 1501 -----  
 H4\_Nav\_6 1978 RRQNALRKSS-----  
 H13\_Nav\_6 2032 RRQNALRKSSL-----  
 H13\_Nav\_7 2127 LQAFLLN-----  
 H4\_Nav\_7 2033 -----  
 H4\_Nav7 2193 LQ-----  
 H13\_Nav\_7 1878 -----
