# Supplementary material
Source: PubMed Central journal article supplement (PMC8214824)
Supplement: NIHMS1703393-supplement-Supplement_5.pdf [file NIHMS1703393-supplement-Supplement_5.pdf]

## Supplement 5

### Sodium Action Potentials in Placozoa: Insights into Behavioral Integration and Evolution of Nerveless Animals

Daria Y. Romanova<sup>1¶</sup>, Ivan V. Smirnov<sup>1¶</sup>, Mikhail A. Nikitin<sup>2¶</sup>, Andrea B. Kohn<sup>3</sup>, Alisa I. Borman<sup>4</sup>, Alexey Y. Malyshev<sup>1</sup>, Pavel M. Balaban<sup>1\*</sup>, Leonid L. Moroz<sup>3,5\*</sup>

<sup>1</sup>Institute of Higher Nervous Activity and Neurophysiology, Moscow 117485, Russia;

<sup>2</sup>Belozersky Institute of Physico-Chemical Biology, Moscow State University, Moscow 119991, Russia;

<sup>3</sup>Whitney Laboratory for Marine Bioscience, University of Florida, St. Augustine, FL, 32080, USA;

<sup>4</sup>Department of Evolutionary Biology, Biological Faculty, Lomonosov Moscow State University, Moscow 119991, Russia;

<sup>5</sup>Departments of Neuroscience and McKnight Brain Institute, University of Florida, Gainesville, FL, 32610, USA

**Supplementary Data:** Domain organization of Na<sub>v</sub> channels in Placozoa: *Trichoplax adhaerens* (H1 haplotype), *Trichoplax* sp. (H2 haplotype), *Hoilungia* sp. (H4 haplotypes), *Hoilungia hongkongensis* (H13 haplotype).

**Yellow** – polar, acidic amino acids

**Light blue** – polar, basic amino acids

**Grey** – non-polar, hydrophobic amino acids

**Green** – polar, uncharged amino acids

**Purple** - cysteine

| Gene ID              | DI   | DII  | DIII | In.Gate              | DIV  | Pore |
|----------------------|------|------|------|----------------------|------|------|
| <i>Homo Nav</i> 1.1  | QDFW | GEWI | FKGW | IFMT <del>EE</del> Q | SAGW | DEKA |
| <i>Homo Nav</i> 1.3  | QDYW | GEWI | FKGW | IFMT <del>EE</del> Q | SAGW |      |
| <i>Homo Nav</i> 1.5  | QDCW | GEWI | FKGW | IFMT <del>EE</del> Q | SAGW |      |
| <i>Homo Nav</i> 1.8  | QDSW | GEWI | FKGW | IFMT <del>EE</del> Q | SAGW |      |
| <i>Monosiga</i>      | LDFW | GEWI | FEGW | LFLTEGQ              | GAGW | DEEA |
| <i>Salpingoeca</i>   | ---- | GEWI | FEGW | VLLTKAQ              | AAGW |      |
| <i>Mnemiopsis α</i>  | MDIW | GEWI | FEGW | VLLTPGQ              | SAGW |      |
| <i>Mnemiopsis β</i>  | LDFW | GEWI | ---- | VLLTPGQ              | SAGW |      |
| <i>Pleurobrachia</i> | LDFW | GEWI | FEGW | VLLTPGQ              | SAGW |      |
| <i>Sycon</i>         | ---- | GEWI | FEGW | KFLTPSQ              | AAGW |      |
| <i>Sycon</i>         | ---- | GEWV | FEGW | LLLTNEQ              | AAGW |      |
| <i>Sycon</i>         | ---- | EGWV | LEGW | -LLTVDQ              | GEDW |      |
| <i>Cyanea</i>        | LDYW | GKWI | LEGW | IFLTPGQ              | AAGW |      |
| <i>Clytia α</i>      | ---- | GKWI | LEGW | FFLTPGQ              | AAGW |      |
| <i>Clytia β</i>      | LDYW | GEWI | FEGW | VFLTTEQ              | SAGW | DEEA |
| <i>Rhopilema α</i>   | MDYW | GEWI | FEGW | IFLTSNQ              | SAGW | DEEA |
| <i>Rhopilema β</i>   | LDYW | GKWI | LEGW | ILLTAGQ              | AAGW | DKEA |
| <i>Aurelia 21α</i>   | LDYW | GKWI | LEGW | IFLTSQ               | AAGW | DKEA |
| <i>Aurelia 21β</i>   | MDYW | GEWI | FEGW | IFLTSQ               | SAGW | DEEA |
| <i>Aurelia V2 α</i>  | MDYW | GEWI | FEGW | IFLTSNQ              | SAGW | DEEA |
| <i>Aurelia V2 β</i>  | LDYW | GKWI | LEGW | IFLTSQ               | AAGW | DKEA |
| <i>Morbakka</i>      | LDFW | GKWI | LEGW | IFLTGGQ              | AAGW |      |
| <i>Chrysaora</i>     | LDYW | GKWI | LEGW | IYLTTPGQ             | AAGW |      |
| <b>Placozoa</b>      |      |      |      |                      |      |      |
| H1_Nav_1             | MDFW | GEWV | FEGW | ILLTESQ              | AAGW | DEEA |
| H2_Nav_1             | MDFW | GEWV | FEGW | ILLTESQ              | AAGW |      |
| H4_Nav_1             | MDFW | GEWI | FEGW | ILLTDSQ              | SAGW |      |
| H13_Nav_1            | MDFW | GEWI | FEGW | ILLTDSQ              | SAGW |      |
| H1_Nav_2             | LDNW | GEWI | FEGW | LFMTESQ              | SAGW |      |
| H2_Nav_2             | LDNW | GEWI | FEGW | LFMTESQ              | SAGW |      |
| H4_Nav_2             | LDNW | GEWI | FEGW | IFLTESQ              | ---- |      |
| H13_Nav_2            | LDNW | GEWI | FEGW | IFLTESQ              | ---- |      |
| H1_Nav_3             | QDAW | GEWI | FDGW | IYLTDSQ              | AAGW | DEDA |
| H2_Nav_3             | QDAW | GEWI | FDGW | IYLTDSQ              | AAGW |      |
| H4_Nav_3             | QDAW | GEWK | FDGW | AFLSESQ              | ---- |      |
| H13_Nav_3            | QDAW | GEWK | FDGW | AFLSESQ              | ---- |      |
| H1_Nav_4             | QDQW | GEWS | LDGW | GALALNQ              | AAGW |      |
| H2_Nav_4             | QDQW | GEWS | LDGW | -----                | AAGW |      |
| H4_Nav_4             | QDQW | GEWS | LDGW | ALFTDTQ              | ---- |      |
| H13_Nav_4            | EDQW | GEWS | QDGW | -----                | ---- |      |
| H1_Nav_5             | QDQW | GEWS | ---- | -----                | ---- |      |
| H2_Nav_5             | QDQW | GEWS | ---- | -----                | ---- |      |
| H4_Nav_6             | QDQW | GEWS | MDGW | TLFTDSQ              | GSGW | DEDS |
| H13_Nav_6            | QDQW | GEWS | MDGW | TLFTDSQ              | GSGW | DEDS |
| H13_Nav_7            | LDNW | GEWS | LDGW | SLFTESQ              | ATGW | DEDT |
| H4_Nav_7             | LDNW | GEWS | LDGW | SLFTESQ              | ATGW | DEDT |
| H4_Nav_7             | LDNW | GEWS | LDGW | SLFTESQ              | ASGW | DEDS |
| H13_Nav_7            | LDNW | GEWS | LDGW | SLFTESQ              | ATGW | DEDT |
