# Supplementary material
Source: PubMed Central journal article supplement (PMC8214824)
Supplement: NIHMS1703393-supplement-Supplement_6.pdf [file NIHMS1703393-supplement-Supplement_6.pdf]

## Supplement 6

### Sodium Action Potentials in Placozoa: Insights into Behavioral Integration and Evolution of Nerveless Animals

Daria Y. Romanova<sup>1¶</sup>, Ivan V. Smirnov<sup>1¶</sup>, Mikhail A. Nikitin<sup>2¶</sup>, Andrea B. Kohn<sup>3</sup>, Alisa I. Borman<sup>4</sup>, Alexey Y. Malyshev<sup>1</sup>, Pavel M. Balaban<sup>1\*</sup>, Leonid L. Moroz<sup>3,5\*</sup>

<sup>1</sup>Institute of Higher Nervous Activity and Neurophysiology, Moscow 117485, Russia;

<sup>2</sup>Belozersky Institute of Physico-Chemical Biology, Moscow State University, Moscow 119991, Russia;

<sup>3</sup>Whitney Laboratory for Marine Bioscience, University of Florida, St. Augustine, FL, 32080, USA;

<sup>4</sup>Department of Evolutionary Biology, Biological Faculty, Lomonosov Moscow State University, Moscow 119991, Russia;

<sup>5</sup>Departments of Neuroscience and McKnight Brain Institute, University of Florida, Gainesville, FL, 32610, USA

**Supplementary Data:** Domain organization and selectivity filter of Ca<sub>v</sub> channels in Placozoa: *Trichoplax adhaerens* (H haplotype), *Trichoplax* sp. (H2 haplotype), *Hoilungia* sp. (H4 haplotypes), *Hoilungia hongkongensis* (H13 haplotype).

| Gene ID               | DI                                             | DII                          | DIII                             | DIV                               | Selective filter |
|-----------------------|------------------------------------------------|------------------------------|----------------------------------|-----------------------------------|------------------|
| H1_Ca <sub>v</sub> 1  | CITMEGW <sup>Green</sup> TN                    | IL <sup>Yellow</sup> TGEDWNE | IT <sup>Light blue</sup> TFEGWPS | CAT <sup>Purple</sup> GENWQSI     | EEEE             |
| H2_Ca <sub>v</sub> 1  | CITMEGW <sup>Green</sup> TN                    | IL <sup>Yellow</sup> TGEDWNE | IT <sup>Light blue</sup> TFEGWPS | CAT <sup>Purple</sup> GENWQSI     |                  |
| H13_Ca <sub>v</sub> 1 | CITMEGW <sup>Green</sup> TN                    | IL <sup>Yellow</sup> TGEDWNE | IT <sup>Light blue</sup> TFEGWPS | CAT <sup>Purple</sup> GENWQSI     |                  |
| H1_Ca <sub>v</sub> 2  | CIS <sup>Purple</sup> LEGW <sup>Green</sup> TN | VLS <sup>Yellow</sup> GEDWNE | MSTA <sup>Light blue</sup> EG--- | CST <sup>Purple</sup> GENWPEV     | EEEE             |
| H2_Ca <sub>v</sub> 2  | CIS <sup>Purple</sup> LEGW <sup>Green</sup> TN | VLS <sup>Yellow</sup> GEDWNE | IT <sup>Light blue</sup> TFEGWPS | CST <sup>Purple</sup> GENWPEV     |                  |
| H13_Ca <sub>v</sub> 2 | CIS <sup>Purple</sup> LEGW <sup>Green</sup> TN | IL <sup>Yellow</sup> SGEDWNE | MSTA <sup>Light blue</sup> EGWPR | CST <sup>Purple</sup> GENWPEV     |                  |
| H1_Ca <sub>v</sub> 3  | VIT <sup>Light blue</sup> LEAWVD               | ILT <sup>Yellow</sup> QEDWNV | ISS <sup>Light blue</sup> KDGWMD | IAT <sup>Light blue</sup> GDNWQGI | EEDD             |
| H2_Ca <sub>v</sub> 3  | VIT <sup>Light blue</sup> LEAWVD               | ILT <sup>Yellow</sup> QEDWNV | ISS <sup>Light blue</sup> KDGWMD | IAT <sup>Light blue</sup> GDNWQGI |                  |
| H13_Ca <sub>v</sub> 3 | VIT <sup>Light blue</sup> LEAWVD               | ILT <sup>Yellow</sup> QEDWNV | ISS <sup>Light blue</sup> KDGWMD | IAT <sup>Light blue</sup> GDNWQGI |                  |

**Yellow** – polar, acidic amino acids

**Light blue** – polar, basic amino acids

**Grey** – non-polar, hydrophobic amino acids

**Green** – polar, uncharged amino acids

**Purple** - cysteine
